# Supplementary material for: Bone Diagenesis in Short Timescales: Insights from an Exploratory Proteomic Analysis
Source: MDPI journal article supplement (doi:10.3390/biology10060460), 2021-05-23
Supplement: s1 [file s1]

## Supplementary Material

### Bone Diagenesis in Short Timescales: Insights from an Exploratory Proteomic Analysis

#### [Contents]:

**Fig. S1.** **A)** Monthly temperatures collected at the HuddersFIELD site and **B)** average monthly rainfall at the HuddersFIELD site during the field experiment

**Data S1.** Progenesis protein exported tables with relative abundances for proteins used for PCA plots and ANOVA  $p$  and  $q$  values.

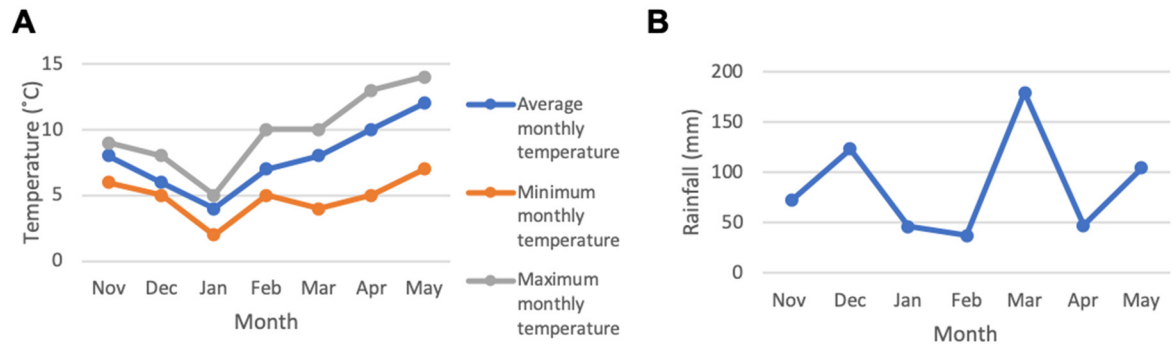

**Figure S-1.** A) Monthly temperatures collected at the HuddersFIELD site and B) average monthly rainfall at the HuddersFIELD site during the field experiment.
