# Supplementary material for: Bone Diagenesis in Short Timescales: Insights from an Exploratory Proteomic Analysis
Source: Biology (Basel). 2021 May 23;10(6):460. doi: 10.3390/biology10060460 (PMC8224596; doi:10.3390/biology10060460)
Supplement: Supplementary file 1 [file biology-10-00460-s001.zip › Data S1.xlsx]

## Sheet: Fleshed vs defleshed vs whole 
Protein export fleshed vs defleshed vs whole												Normalized abundance																																				Raw abundance
												Fleshed limb												Defleshed bone												Whole body												Fleshed limb
Accession	Peptide count	Unique peptides	Confidence score	Anova (p)	q Value	Max fold change	Power	Highest mean condition	Lowest mean condition	Mass	Description	NP-7	NP-8	NP-9	NP-16	NP-17	NP-18	NP-19	NP-20	NP-21	NP-22	NP-23	NP-24	NP-4	NP-5	NP-6	NP-10	NP-11	NP-12	NP-28	NP-29	NP-30R	NP-34	NP-35	NP-36	NP-1	NP-2	NP-3	NP-13	NP-14	NP-15	NP-31	NP-32	NP-33	NP-37	NP-38	NP-39	NP-7	NP-8
APOA2_RAT	3	3	145.9	1.5463e-05	0.000574243	2.7735	0.998848	Whole body	Fleshed limb	11489	Apolipoprotein A-II OS=Rattus norvegicus OX=10116 GN=Apoa2 PE=2 SV=1	288916	307318	362252	154339	562726	594561	248304	101621	518373	182105	232056	66246.2	730723	210548	750607	622542	531283	584524	485983	794055	812139	529375	802617	627030	1.64021e+06	522724	318755	806533	838721	725614	650084	525137	855085	1.30487e+06	797788	1.05126e+06	156855	216728
HS90A_RAT	6	3	291.76	3.18716e-05	0.000710162	2.99939	0.997538	Defleshed bone	Fleshed limb	85161	Heat shock protein HSP 90-alpha OS=Rattus norvegicus OX=10116 GN=Hsp90aa1 PE=1 SV=3	42370.8	22851.2	24156.4	34769.2	27577.5	38523	18120.7	25027.8	36315	30928.3	17553.4	13727	81001.8	56028.2	67385.2	100709	112104	176842	24061	27842.1	136853	76717.2	70420.5	65595.6	32289.3	25798.3	66442.5	25971.3	49657	33087.1	10470	12469.8	9677.92	50464	26312.9	30640.9	23003.5	16115.2
PPIB_RAT	2	2	89.85	6.90856e-05	0.00123429	2.84334	0.994748	Fleshed limb	Whole body	23845	Peptidyl-prolyl cis-trans isomerase B OS=Rattus norvegicus OX=10116 GN=Ppib PE=1 SV=3	99964.5	44207.9	59872.9	45891.1	47362.6	88975.2	31598.3	53473.2	33839.2	41827.3	36757.5	36135.4	44980.8	57416.4	62114.2	31611	6804.12	12007.8	32639	19848.9	41020.9	50489.7	35787.6	45847.1	36123.6	27101.5	28051	22001.3	20537.3	14762.5	13977.1	14430.7	10583	15212.6	6072.98	9166.09	54271.6	31176.4
ANXA1_RAT	20	20	854.92	0.000350481	0.0039047	8.3714	0.978409	Whole body	Defleshed bone	39147	Annexin A1 OS=Rattus norvegicus OX=10116 GN=Anxa1 PE=1 SV=2	649332	1.26849e+06	96124.3	134304	908472	152749	1.37464e+06	1.50341e+06	1.20967e+06	1.16139e+06	433665	1.22895e+06	202338	257521	189125	53018.6	138541	94556.6	68693	73295.1	50708.4	49374.1	50463.6	42186.9	329162	315324	135926	207532	83952.4	69230.5	2.86918e+06	3.27548e+06	2.87395e+06	179203	91211.2	200043	352528	894569
VDAC1_RAT	5	5	212.08	0.000459751	0.00425811	10.8878	0.973263	Fleshed limb	Defleshed bone	30851	Voltage-dependent anion-selective channel protein 1 OS=Rattus norvegicus OX=10116 GN=Vdac1 PE=1 SV=4	29923.2	140724	8770.78	61982.5	488006	62482.4	119821	73385.5	53494.9	324161	912695	288966	6537.89	10575	12702	3542.31	10975.4	4059.47	61723.3	35039	35092	33718.8	13794.3	7771.96	87789.7	78278.3	52910.8	36301.1	7564.38	9984.71	58536.5	50664.5	65057.9	2153.72	2860.12	3027.4	16245.6	99241.6
RPN1_RAT	2	2	106.18	0.000576809	0.00427676	8.26776	0.968184	Whole body	Defleshed bone	68376	Dolichyl-diphosphooligosaccharide--protein glycosyltransferase subunit 1 OS=Rattus norvegicus OX=10116 GN=Rpn1 PE=2 SV=1	8146.59	29446.5	1304.38	8091.25	5743.81	8983.59	23858.5	32325.1	9247.69	16902.9	13359.7	21345.5	1439.2	892.328	1788.84	1065.11	1365.1	4278.13	5386.58	7331.92	668.61	1444.04	284.599	937.47	6343.86	1152.48	1359.18	3402.25	3841.95	4560.33	111957	44692.5	37532.4	4657.76	1209.51	1544	4422.86	20766.4
ACTC_RAT;ACTA_RAT	3	3	128.73	0.000614203	0.00427676	3.61899	0.96664	Defleshed bone	Fleshed limb	42334	Actin, alpha cardiac muscle 1 OS=Rattus norvegicus OX=10116 GN=Actc1 PE=2 SV=1	47788.8	61031.4	68549.1	64102.2	78651	101951	104931	103437	230331	43784.7	52380	33766.3	190902	151296	262101	460527	1.14647e+06	554679	114382	102156	207986	136239	132877	125725	132665	78253.2	71593.8	110936	109137	85259.6	119579	103573	127307	358869	297677	482579	25945	43040.8
ANXA2_RAT	3	3	158.46	0.000803363	0.00496568	3.23668	0.959302	Fleshed limb	Defleshed bone	38939	Annexin A2 OS=Rattus norvegicus OX=10116 GN=Anxa2 PE=1 SV=2	74789.3	63733	44241.9	43757.1	129696	31925.9	223140	241205	196401	160850	193906	245367	107466	126187	120387	58900.9	13517.3	21636	16714.5	8877.18	1379.3	11627.2	10565	12219.7	58729.6	68796.1	48714.9	33682.7	28495.7	28257.8	17419.4	142402	106903	36623.8	32769.3	21558.2	40603.8	44946
COX5A_RAT	4	4	184.24	0.000825171	0.00496568	6.07761	0.958501	Fleshed limb	Defleshed bone	16347	Cytochrome c oxidase subunit 5A, mitochondrial OS=Rattus norvegicus OX=10116 GN=Cox5a PE=1 SV=1	106803	207391	56064.6	47386.1	211708	79168.2	189320	172626	185749	444846	1.0789e+06	375177	20333.2	52213.3	25562.6	21894.6	9702.77	22682	78706.9	46281.2	56060.8	51421.8	92032.2	42249.8	49346.1	18651.7	19143.6	23589.2	17183.7	15701.8	612098	264919	212544	66603	36188.8	117743	57984.2	146257
HEMO_RAT	4	4	135.68	0.000891426	0.00496568	2.54248	0.956115	Defleshed bone	Fleshed limb	52060	Hemopexin OS=Rattus norvegicus OX=10116 GN=Hpx PE=1 SV=3	15678.9	30331	21974.9	55033.4	8787.27	20179.1	43975	31827.3	59883.9	10345.4	36726.1	26354.7	185385	81553.9	108862	51858.3	49278.3	58214.9	67045	37726.6	114274	43384.2	70643.7	49856.9	24266.8	29594.8	33538.8	18694.1	26605.7	26791	104430	78850.6	112464	92141.7	39351	36205.8	8512.21	21390.2
ILEUA_RAT	3	3	130.98	0.00196208	0.00819816	7.15405	0.924468	Defleshed bone	Fleshed limb	42871	Leukocyte elastase inhibitor A OS=Rattus norvegicus OX=10116 GN=Serpinb1a PE=1 SV=1	3493.29	6182.38	10392.4	4157.51	4398.74	4753.15	15883.5	17504.6	18650.7	3534.9	4025.97	2029.63	286156	102388	142544	10981.4	23259.9	19221.6	7873.9	11708.8	22155.5	15615.2	25395.1	12383	14006.2	4802.53	13590	6846.85	6804.89	5494.63	42379.6	40840.8	43592.3	104397	74418.2	63522.6	1896.54	4359.96
HS90B_RAT;TRAP1_RAT	7	3	371.83	0.00198681	0.00819816	3.16165	0.923845	Defleshed bone	Whole body	83571	Heat shock protein HSP 90-beta OS=Rattus norvegicus OX=10116 GN=Hsp90ab1 PE=1 SV=4	41768.8	29447.4	37901.8	32986.4	27394.6	30497.6	18798.9	33130	77625.3	34204.2	36475.5	21556.7	136528	72096.6	86871.6	199326	227016	259823	15987.1	18047.2	94315.2	56370.1	50887.5	59528.2	30391.9	21250.5	74683.4	16349.6	34213.9	18754.9	5665.7	7837.52	5660.07	102191	41475.1	45365.1	22676.7	20767
FGFR1_RAT	2	2	81.09	0.0021695	0.00863226	2.10159	0.919353	Whole body	Fleshed limb	92792	Fibroblast growth factor receptor 1 OS=Rattus norvegicus OX=10116 GN=Fgfr1 PE=1 SV=1	40526.5	41001.1	26554	107343	67258.6	43457	50199.6	78040.2	46637.9	40191.1	25523.9	30492.8	117800	64140.9	65039.3	99889.4	99812.1	98787.9	76110.4	62659.6	114948	86148.5	173353	172871	38916.4	51910	23597.2	54411.7	78264.1	67399.7	81020.5	128998	173464	184786	124631	247727	22002.2	28914.9
EF1A2_RAT;EF1A1_RAT	2	2	90.15	0.00232763	0.00894208	2.48103	0.915609	Fleshed limb	Whole body	50764	Elongation factor 1-alpha 2 OS=Rattus norvegicus OX=10116 GN=Eef1a2 PE=1 SV=1	9972.11	7900.66	2793.6	4115.49	11376.3	8256.68	13682.3	14867.4	5570.09	12140.8	12579	27200.1	2548	2050.24	4873.9	8553.79	18346.4	9637.09	13445.8	4996.2	4289.06	7096.55	8820.36	1232.77	10790.7	3230.06	12671	14206.9	458.913	2926.75	840.207	1260.25	570.79	1429.93	3668.96	526.409	5413.95	5571.73
MYH4_RAT;MYH3_RAT;MYH6_RAT;MYH7_RAT	12	12	612.69	0.00351829	0.0122491	13.7988	0.890721	Fleshed limb	Whole body	223653	Myosin-4 OS=Rattus norvegicus OX=10116 GN=Myh4 PE=1 SV=1	18071.7	27110.9	9397.21	12160	16750.6	20875.9	355464	116180	625733	174081	911065	538351	19911.1	8652.39	19205	12985	60985.4	61158.3	23338.2	49959.9	37471.8	13827.3	10206.2	26180.9	17315.3	11647.1	12824.7	16576.1	19566	10388.6	19661.2	14003.8	15380.3	23610	20481	23291.3	9811.3	19119.3
OSTP_RAT	18	17	1340.37	0.00382112	0.0128245	3.82867	0.885117	Defleshed bone	Fleshed limb	35113	Osteopontin OS=Rattus norvegicus OX=10116 GN=Spp1 PE=1 SV=2	1.15447e+07	6.41563e+06	1.01297e+07	5.44104e+06	4.69206e+06	2.89756e+06	3.18819e+06	8.36102e+06	1.52003e+07	1.32945e+07	5.43596e+06	1.34241e+07	4.00495e+07	4.37571e+07	1.36598e+07	4.39673e+07	7.58515e+07	5.60117e+07	1.92114e+07	1.62336e+07	1.69193e+07	5.0285e+06	8.76127e+06	4.35109e+07	4.9726e+06	1.07337e+07	1.44475e+07	3.75714e+06	2.09632e+07	5.90205e+06	1.0649e+07	7.15973e+06	6.0921e+06	6.91075e+07	3.12432e+07	7.48177e+07	6.26772e+06	4.52446e+06
H2B1_RAT;H2B1A_RAT	8	8	563.88	0.00396367	0.0128245	2.66875	0.882561	Whole body	Fleshed limb	13982	Histone H2B type 1 OS=Rattus norvegicus OX=10116 PE=1 SV=2	630374	516520	869344	1.50893e+06	982534	2.74316e+06	1.18491e+06	2.50789e+06	1.2403e+06	559524	577931	203739	2.05322e+06	1.44175e+06	3.83837e+06	1.83615e+06	1.45928e+06	1.07561e+06	1.53175e+06	1.93909e+06	3.77302e+06	2.38954e+06	3.00892e+06	3.33691e+06	1.90954e+06	771202	353268	1.6207e+06	2.82044e+06	2.53696e+06	3.68135e+06	5.39844e+06	7.63833e+06	1.62951e+06	2.00194e+06	5.73355e+06	342236	364262
AN32B_RAT	2	2	144.57	0.00440387	0.0136287	3.60422	0.874962	Defleshed bone	Fleshed limb	31213	Acidic leucine-rich nuclear phosphoprotein 32 family member B OS=Rattus norvegicus OX=10116 GN=Anp32b PE=1 SV=1	35669.3	12454.5	26838.4	21859.1	27098.5	35121.8	10520.1	23918.2	36179.1	35317.1	19428.1	9163.59	89385.7	53227.7	56371.7	108504	15370.5	18335.4	374215	175213	23793.1	47991.7	50919.1	44755	23415.4	32471.3	32493.1	15984.5	28800.6	24816.4	9802.09	24447.5	29148.3	74454.8	21614.9	72381	19365.2	8783.21
IBP1_RAT	2	2	117.88	0.00559772	0.0164116	2.12226	0.856245	Fleshed limb	Whole body	30691	Insulin-like growth factor-binding protein 1 OS=Rattus norvegicus OX=10116 GN=Igfbp1 PE=1 SV=2	161225	147827	382261	235801	175690	148456	448469	327086	153191	206981	119015	65967.2	152973	174583	385913	112595	70037.3	162876	45293.6	48265	70463.1	57116.8	126674	56200.1	73352.6	155369	43172.6	106206	61156.5	116947	42772.9	71015.6	113881	157970	122857	147202	87530.5	104251
C1QB_RAT;CBLN1_RAT	3	3	128.77	0.00578241	0.0165184	2.37394	0.853557	Defleshed bone	Fleshed limb	26801	Complement C1q subcomponent subunit B OS=Rattus norvegicus OX=10116 GN=C1qb PE=1 SV=2	249174	158528	199502	68839.6	66926.8	90846.3	38369.6	98251.3	90800.4	91374.7	95235.1	36161.1	237011	419814	229586	288654	453971	230234	96629.9	112796	356818	180971	233937	207732	112282	168997	276514	43176.3	49151.4	38653.1	43830.1	122652	144572	493997	245596	322327	135279	111798
CHAD_RAT	8	8	420.74	0.00943606	0.0228416	3.42948	0.808285	Defleshed bone	Fleshed limb	40892	Chondroadherin OS=Rattus norvegicus OX=10116 GN=Chad PE=2 SV=1	474892	391354	1.06924e+06	769853	262915	871047	566591	584576	764227	272438	240225	232211	1.36446e+06	994251	1.59776e+06	1.45578e+06	8.2973e+06	3.25185e+06	413962	566432	508886	318937	800219	2.72031e+06	817828	720336	1.15098e+06	650060	713244	533664	617828	606979	624854	1.34368e+06	1.05099e+06	2.68819e+06	257823	275992
PRG2_RAT	2	2	72.06	0.00947875	0.0228416	4.10026	0.807825	Whole body	Fleshed limb	25569	Bone marrow proteoglycan OS=Rattus norvegicus OX=10116 GN=Prg2 PE=2 SV=1	81107.7	260833	9411.41	31077.2	50487.4	18032.6	95728	81662	41982.2	127445	14320.1	44978.8	203262	419581	369752	145426	46971.8	40298.4	35032.7	69805.5	120817	248951	289117	79780.3	137063	128785	117352	74626.2	37053.2	51960.1	55975.4	298944	660388	317215	1.18915e+06	445677	44034.1	183946
CYC_RAT	2	2	73.18	0.0095336	0.0228416	2.03887	0.807236	Fleshed limb	Whole body	11712	Cytochrome c, somatic OS=Rattus norvegicus OX=10116 GN=Cycs PE=1 SV=2	11347.7	8471.2	17872	7580.05	12947.7	22748.4	22981	23351.1	21789	21414.4	11759	19577.9	5041.91	2126.5	18268.2	21683.5	15756.6	15840.7	8319.73	11840.6	7059.21	18553.6	18503.7	20333.3	18803.8	10666	6617.3	11150.6	12979.8	13179.1	1268.17	444.706	530.037	7066.25	2870.88	13419	6160.75	5974.09
RIPR2_RAT	2	2	51.95	0.0147793	0.0299374	2.44869	0.758661	Whole body	Fleshed limb	145987	Rho family-interacting cell polarization regulator 2 OS=Rattus norvegicus OX=10116 GN=Ripor2 PE=1 SV=1	15076.6	30978.9	5355.64	7260.57	14423.7	6758.06	23137	20059.2	13478.1	19908.7	6477.11	9199.85	62085.4	41421.2	38386.1	27368.4	24525.7	15226.7	22898.3	18952.7	11689.4	20285.2	6827.5	5340.51	37934.7	22871.1	24286.9	19280	10310.4	15333.4	15211.1	37922.7	28714.4	121877	47943.1	39767.5	8185.24	21847.1
HMGB1_RAT	3	2	170.01	0.0161793	0.0321297	9.34473	0.747675	Defleshed bone	Fleshed limb	25049	High mobility group protein B1 OS=Rattus norvegicus OX=10116 GN=Hmgb1 PE=1 SV=2	7916.48	10806.3	9809.48	16528.7	2607.24	5664.34	9935.78	12943.5	33600.2	14953.3	39198.5	16934.6	142698	99800.8	139275	193098	732760	251909	25920.2	15678.5	50782.3	4990.8	5958.4	27575.3	5259.81	6467.66	21037.7	7560.44	30100.7	22076.8	10546.2	8424.89	7734.15	296777	74735.6	201989	4297.93	7620.87
A1I3_RAT;MUG1_RAT	2	2	73.43	0.0167267	0.0321297	3.49968	0.743554	Whole body	Fleshed limb	165038	Alpha-1-inhibitor 3 OS=Rattus norvegicus OX=10116 GN=A1i3 PE=1 SV=1	9349.71	6840.38	17647.6	4532.83	5595.25	2406.03	25171	10247.5	55497.3	4117.77	5087.72	4703.27	108803	49806.7	35432.8	21280.4	41232.6	31486.5	31412.5	16451.2	22169.1	12394	9839.65	11058	11781.9	4385.97	3647.54	4417.05	11105.6	13825.1	70722.2	46698.3	65744.2	105070	39872	151869	5076.04	4824
MMP13_RAT	9	9	334.78	0.0170266	0.0321513	2.65973	0.741335	Defleshed bone	Fleshed limb	53569	Collagenase 3 (Fragment) OS=Rattus norvegicus OX=10116 GN=Mmp13 PE=1 SV=1	1.65258e+06	1.35089e+06	1.02046e+06	335083	202504	137826	164805	527918	391706	780570	1.06062e+06	433845	1.44738e+06	2.93037e+06	768217	1.17487e+06	5.41567e+06	1.6956e+06	623007	980143	2.06994e+06	502648	717257	3.10916e+06	440182	1.02922e+06	3.24944e+06	203179	584059	237490	337449	734223	424233	3.42996e+06	1.44716e+06	708294	897202	952680
PCSK1_RAT;PCS1N_RAT	2	2	112.67	0.0219416	0.037038	2.54586	0.708276	Whole body	Fleshed limb	27455	ProSAAS OS=Rattus norvegicus OX=10116 GN=Pcsk1n PE=1 SV=1	4428.8	5337.59	10730.9	11475.5	24926.2	27141	29765.7	15689.9	31797.8	5219.39	2721.44	3250.42	16144.9	2792.69	30228.5	17640.7	31017.4	11553.2	7636.87	14717.9	7314.94	12777.6	33604.9	25190.4	24628.9	24661.4	4140.94	26797.9	13987.4	14397.1	42545.4	41651.4	24001.4	57667.1	40172.5	124471	2404.44	3764.19
DUT_RAT	2	2	105.52	0.0247926	0.0394592	5.02579	0.691433	Defleshed bone	Fleshed limb	22274	Deoxyuridine 5'-triphosphate nucleotidohydrolase OS=Rattus norvegicus OX=10116 GN=Dut PE=2 SV=3	251.49	1847.38	3792.34	440.373	1241.05	1189.42	2996.93	3524.08	9555.4	1081.52	1549.45	2722.24	43007.5	7131.25	32371.8	3647.55	27757.2	8664.69	1968.8	5642.08	9822.82	4211.66	4343.4	3168.14	584.104	1225.36	386.369	331.276	1601.17	895.795	1905.64	11986.3	15497.5	44531.9	20897.6	30948.4	136.536	1302.82
LAC2_RAT	3	3	120.64	0.0274144	0.0409299	2.71031	0.677132	Defleshed bone	Fleshed limb	11482	Ig lambda-2 chain C region OS=Rattus norvegicus OX=10116 PE=4 SV=1	76345.8	41103	55878.1	38376.1	85780.9	72734.7	92474.1	87583.4	94949.8	27750.8	32343.8	19759.2	273470	86389.8	140133	96826.6	40346.8	12727.7	99991	97174.5	200694	390574	286718	240144	127670	75559.5	44667.9	84043.4	65733.2	80759	40564.1	69233.6	93161	264276	78327.9	123174	41448.8	28986.8
GELS_RAT	4	4	192.45	0.0278137	0.0409299	2.1426	0.675043	Defleshed bone	Fleshed limb	86413	Gelsolin OS=Rattus norvegicus OX=10116 GN=Gsn PE=1 SV=1	16415.3	34098	59554.2	17684.7	19157.7	48324.8	45149.7	39232.5	64936.8	17668.2	10541.8	1896.68	158419	74307.4	109104	117280	60806.3	24163.3	20309.3	31652.2	28506.2	35749.2	73386.7	69065.8	57289.8	46019.2	16048	47046.9	39301.4	49142.8	12724.4	43922.7	39934.8	120561	77923.3	198970	8912	24046.7
DMP1_RAT	7	7	323.96	0.0282884	0.0409299	4.65634	0.672587	Defleshed bone	Fleshed limb	53141	Dentin matrix acidic phosphoprotein 1 OS=Rattus norvegicus OX=10116 GN=Dmp1 PE=2 SV=1	6.81762e+06	4.75844e+06	1.06941e+07	1.44077e+06	1.52835e+06	1.48931e+06	1.10083e+06	4.2049e+06	2.28375e+06	2.9663e+06	4.95953e+06	3.15747e+06	3.39803e+07	3.82767e+07	1.22276e+07	3.57922e+07	3.69513e+07	2.29572e+07	1.42742e+06	1.67325e+06	5.83564e+06	2.96302e+06	2.6107e+06	1.67091e+07	1.38119e+06	4.28942e+06	5.68551e+06	2.3937e+06	5.54301e+06	3.86571e+06	1.4271e+06	3.04908e+06	5.73435e+06	2.54478e+07	1.09292e+07	3.84824e+07	3.70135e+06	3.35577e+06
H2A1C_RAT;H2A1F_RAT;H2A1_RAT;H2A4_RAT;H2AZ_RAT	8	8	312.65	0.030112	0.0424655	2.22366	0.663424	Whole body	Fleshed limb	14097	Histone H2A type 1-C OS=Rattus norvegicus OX=10116 PE=1 SV=2	302588	329485	364243	643825	463146	1.51404e+06	807738	1.27749e+06	965246	349502	541946	267754	1.33491e+06	899021	1.99664e+06	992186	771669	428518	942226	1.11687e+06	2.43124e+06	1.08754e+06	1.32231e+06	1.5449e+06	859591	244497	147178	1.00726e+06	1.57229e+06	1.42582e+06	2.38292e+06	2.11878e+06	3.72432e+06	594063	1.23994e+06	2.08799e+06	164278	232360
MBL1_RAT	2	2	53.63	0.0343345	0.0449292	3.6967	0.643692	Whole body	Fleshed limb	25748	Mannose-binding protein A OS=Rattus norvegicus OX=10116 GN=Mbl1 PE=1 SV=1	4352.88	23916.5	17535.3	10433.2	7042.7	32255	6419.86	11748.8	6204.66	15039.1	10492.9	14192.3	11959	7351.52	7588.25	10581.1	34875	12411.4	9904.11	9117.32	20444.9	38785.1	59087.2	75669.1	27270.1	55903.8	176595	25136.5	122607	69742.6	5554.3	5415.33	10226.9	26648.6	25209	39807	2363.22	16866.5
SET_RAT	2	2	59.89	0.0345031	0.0449292	2.89013	0.642943	Defleshed bone	Fleshed limb	33386	Protein SET OS=Rattus norvegicus OX=10116 GN=Set PE=2 SV=2	8823.57	13794.4	7419.5	20071.4	15286.6	21101.4	43968.2	54683.1	65724.4	9080.76	9814.15	3288.62	200299	6377.65	102966	115544	81201.4	31679.9	36436.1	21966.9	72905.6	32890.9	37960.2	48939.6	2892.31	10931.7	40831.3	7329	24627.9	20656.1	9817.07	43470.9	98339.3	130668	49067.4	67241.2	4790.4	9728.15
PDIA4_RAT	3	3	89.65	0.0351077	0.0449579	3.79553	0.64028	Defleshed bone	Fleshed limb	73017	Protein disulfide-isomerase A4 OS=Rattus norvegicus OX=10116 GN=Pdia4 PE=1 SV=2	18343.5	13862.3	17152.3	16037.9	10525.6	11484.6	7974.87	18582.8	26469.1	10548.6	11128.1	3709.59	88572.5	41028.4	41629.8	132651	182584	33451.5	4234.34	5865.44	23176.6	16938.1	25364.2	33877.3	14832.4	14742.1	25931.9	3527.45	11155.5	7176.08	5136.12	17324.1	31053.6	84791.4	15185.4	38341.2	9958.84	9776.03
C1QC_RAT	5	5	191.7	0.0432183	0.0523363	2.07773	0.60755	Defleshed bone	Fleshed limb	25955	Complement C1q subcomponent subunit C OS=Rattus norvegicus OX=10116 GN=C1qc PE=1 SV=2	102741	141718	125959	45040.6	42710.4	39258.9	30056.9	56913.8	47780.7	73485.2	91640.9	71624.5	207681	264004	171241	248115	215114	142501	45733.7	64019.2	136605	72079.7	112792	125519	71296.7	105660	136773	18352.9	34855.4	33308.2	50879.4	75443	98222	396103	183355	252919	55778.9	99943
ANXA3_RAT	3	3	109.69	0.04533	0.053055	9.62726	0.599821	Whole body	Defleshed bone	36569	Annexin A3 OS=Rattus norvegicus OX=10116 GN=Anxa3 PE=1 SV=4	297.963	4577.61	2473.13	1267.18	2911.35	2663.03	14290.5	13447.8	9243.34	2076.97	3649.5	537.044	455.957	830.014	1040.1	2606.91	5619.75	2501.54	2464.6	6873.09	5764.82	3374.15	1113.16	968.536	9120.63	10757.8	4132.48	3456.69	1268.53	5250.24	73503.1	110298	100780	2054.53	1366.51	1609.6	161.767	3228.24
TPM1_RAT	9	2	451.58	0.045916	0.053055	2.54699	0.597726	Fleshed limb	Whole body	32718	Tropomyosin alpha-1 chain OS=Rattus norvegicus OX=10116 GN=Tpm1 PE=1 SV=3	17384.6	16591.5	15232.3	29553.5	22288.6	72157.9	31639.2	17559.7	36246.1	28292.2	57805	220435	26063.2	21519.4	49511.8	46238.8	18297.9	6093.07	21781.3	15778.1	11472.8	31122.6	21741.1	116101	37162.5	16315.7	36102.3	16046	26415.8	7650.16	9655.92	9476.35	1552.49	35493.4	14747.2	11285.3	9438.24	11700.7
SLIT3_RAT	6	6	262.96	0.048948	0.0545329	2.4999	0.587214	Whole body	Fleshed limb	173703	Slit homolog 3 protein OS=Rattus norvegicus OX=10116 GN=Slit3 PE=2 SV=1	36104.6	24237.3	75362.4	14255.9	13518.6	39206.2	65333.7	105418	113058	12834.7	18752.5	3573.1	208177	130648	169018	223391	153248	76563.7	24097.3	35249.7	68760	21580.8	47468.8	62343.4	45610.7	46248.7	11790.3	65987	45087.4	69071.8	14128.9	31258.4	67896.8	265034	160316	481656	19601.5	17092.7
[truncated: 55 more columns]

## Sheet: Fleshed vs defleshed
Protein export fleshed vs defleshed												Normalized abundance																								Raw abundance
												Fleshed limb												Defleshed bone												Fleshed limb												Defleshed bone
Accession	Peptide count	Unique peptides	Confidence score	Anova (p)	q Value	Max fold change	Power	Highest mean condition	Lowest mean condition	Mass	Description	NP-7	NP-8	NP-9	NP-16	NP-17	NP-18	NP-19	NP-20	NP-21	NP-22	NP-23	NP-24	NP-4	NP-5	NP-6	NP-10	NP-11	NP-12	NP-28	NP-29	NP-30R	NP-34	NP-35	NP-36	NP-7	NP-8	NP-9	NP-16	NP-17	NP-18	NP-19	NP-20	NP-21	NP-22	NP-23	NP-24	NP-4	NP-5
ANXA1_RAT	20	20	854.92	1.23354e-05	0.000678507	7.97056	0.999647	Fleshed limb	Defleshed bone	39147	Annexin A1 OS=Rattus norvegicus OX=10116 GN=Anxa1 PE=1 SV=2	649332	1.26849e+06	96124.3	134304	908472	152749	1.37464e+06	1.50341e+06	1.20967e+06	1.16139e+06	433665	1.22895e+06	202338	257521	189125	53018.6	138541	94556.6	68693	73295.1	50708.4	49374.1	50463.6	42186.9	352528	894569	57243.6	80873.9	694655	62471.5	1.96512e+06	942914	786298	681363	326586	767812	163199	117954
RPN1_RAT	2	2	106.18	1.73227e-05	0.000678507	6.64966	0.999427	Fleshed limb	Defleshed bone	68376	Dolichyl-diphosphooligosaccharide--protein glycosyltransferase subunit 1 OS=Rattus norvegicus OX=10116 GN=Rpn1 PE=2 SV=1	8146.59	29446.5	1304.38	8091.25	5743.81	8983.59	23858.5	32325.1	9247.69	16902.9	13359.7	21345.5	1439.2	892.328	1788.84	1065.11	1365.1	4278.13	5386.58	7331.92	668.61	1444.04	284.599	937.47	4422.86	20766.4	776.777	4872.3	4391.95	3674.12	34107	20273.7	6011.11	9916.62	10061	13336	1160.8	408.72
HS90A_RAT	6	3	291.76	3.54282e-05	0.000693839	2.99939	0.998502	Defleshed bone	Fleshed limb	85161	Heat shock protein HSP 90-alpha OS=Rattus norvegicus OX=10116 GN=Hsp90aa1 PE=1 SV=3	42370.8	22851.2	24156.4	34769.2	27577.5	38523	18120.7	25027.8	36315	30928.3	17553.4	13727	81001.8	56028.2	67385.2	100709	112104	176842	24061	27842.1	136853	76717.2	70420.5	65595.6	23003.5	16115.2	14385.6	20936.9	21086.9	15755.2	25904.4	15697	23605.2	18145.1	13219.1	8576.21	65333	25663.1
COX5A_RAT	4	4	184.24	5.17655e-05	0.000868968	6.07761	0.99759	Fleshed limb	Defleshed bone	16347	Cytochrome c oxidase subunit 5A, mitochondrial OS=Rattus norvegicus OX=10116 GN=Cox5a PE=1 SV=1	106803	207391	56064.6	47386.1	211708	79168.2	189320	172626	185749	444846	1.0789e+06	375177	20333.2	52213.3	25562.6	21894.6	9702.77	22682	78706.9	46281.2	56060.8	51421.8	92032.2	42249.8	57984.2	146257	33387.4	28534.4	161881	32378.3	270642	108268	120739	260983	812498	234399	16400	23915.7
FGFR1_RAT	2	2	81.09	9.86584e-05	0.00144912	2.06214	0.994859	Defleshed bone	Fleshed limb	92792	Fibroblast growth factor receptor 1 OS=Rattus norvegicus OX=10116 GN=Fgfr1 PE=1 SV=1	40526.5	41001.1	26554	107343	67258.6	43457	50199.6	78040.2	46637.9	40191.1	25523.9	30492.8	117800	64140.9	65039.3	99889.4	99812.1	98787.9	76110.4	62659.6	114948	86148.5	173353	172871	22002.2	28914.9	15813.3	64638.4	51428.7	17773.1	71762.8	48945.5	30315.2	23579.4	19221.6	19051	95013.2	29379
VDAC1_RAT	5	5	212.08	0.000148197	0.00148051	10.8878	0.991965	Fleshed limb	Defleshed bone	30851	Voltage-dependent anion-selective channel protein 1 OS=Rattus norvegicus OX=10116 GN=Vdac1 PE=1 SV=4	29923.2	140724	8770.78	61982.5	488006	62482.4	119821	73385.5	53494.9	324161	912695	288966	6537.89	10575	12702	3542.31	10975.4	4059.47	61723.3	35039	35092	33718.8	13794.3	7771.96	16245.6	99241.6	5223.14	37323.9	373150	25554.1	171290	46026.1	34772.3	190179	687335	180537	5273.22	4843.76
HEMO_RAT	4	4	135.68	0.000215309	0.00194617	2.54248	0.988142	Defleshed bone	Fleshed limb	52060	Hemopexin OS=Rattus norvegicus OX=10116 GN=Hpx PE=1 SV=3	15678.9	30331	21974.9	55033.4	8787.27	20179.1	43975	31827.3	59883.9	10345.4	36726.1	26354.7	185385	81553.9	108862	51858.3	49278.3	58214.9	67045	37726.6	114274	43384.2	70643.7	49856.9	8512.21	21390.2	13086.4	33139.4	6719.11	8252.88	62864.5	19961.5	38925.2	6069.45	27657.8	16465.6	149524	37354.8
C1QB_RAT;CBLN1_RAT	3	3	128.77	0.000290392	0.0021283	2.37394	0.984029	Defleshed bone	Fleshed limb	26801	Complement C1q subcomponent subunit B OS=Rattus norvegicus OX=10116 GN=C1qb PE=1 SV=2	249174	158528	199502	68839.6	66926.8	90846.3	38369.6	98251.3	90800.4	91374.7	95235.1	36161.1	237011	419814	229586	288654	453971	230234	96629.9	112796	356818	180971	233937	207732	135279	111798	118806	41453	51175	37154.4	54851.2	61621.5	59021.3	53607.9	71719.9	22592.3	191164	192291
ACTC_RAT;ACTA_RAT	3	3	128.73	0.000327769	0.00213972	3.61899	0.982046	Defleshed bone	Fleshed limb	42334	Actin, alpha cardiac muscle 1 OS=Rattus norvegicus OX=10116 GN=Actc1 PE=2 SV=1	47788.8	61031.4	68549.1	64102.2	78651	101951	104931	103437	230331	43784.7	52380	33766.3	190902	151296	262101	460527	1.14647e+06	554679	114382	102156	207986	136239	132877	125725	25945	43040.8	40822.1	38600.3	60139.8	41696	150004	64873.9	149718	25687.6	39446.5	21096.2	153974	69299.1
OSTP_RAT	18	17	1340.37	0.000373492	0.00230988	3.82867	0.979674	Defleshed bone	Fleshed limb	35113	Osteopontin OS=Rattus norvegicus OX=10116 GN=Spp1 PE=1 SV=2	1.15447e+07	6.41563e+06	1.01297e+07	5.44104e+06	4.69206e+06	2.89756e+06	3.18819e+06	8.36102e+06	1.52003e+07	1.32945e+07	5.43596e+06	1.34241e+07	4.00495e+07	4.37571e+07	1.36598e+07	4.39673e+07	7.58515e+07	5.60117e+07	1.92114e+07	1.62336e+07	1.69193e+07	5.0285e+06	8.76127e+06	4.35109e+07	6.26772e+06	4.52446e+06	6.03241e+06	3.27643e+06	3.58774e+06	1.18505e+06	4.55768e+06	5.24389e+06	9.88036e+06	7.79966e+06	4.09373e+06	8.387e+06	3.23024e+07	2.00424e+07
ILEUA_RAT	3	3	130.98	0.000848772	0.00454997	7.15405	0.957856	Defleshed bone	Fleshed limb	42871	Leukocyte elastase inhibitor A OS=Rattus norvegicus OX=10116 GN=Serpinb1a PE=1 SV=1	3493.29	6182.38	10392.4	4157.51	4398.74	4753.15	15883.5	17504.6	18650.7	3534.9	4025.97	2029.63	286156	102388	142544	10981.4	23259.9	19221.6	7873.9	11708.8	22155.5	15615.2	25395.1	12383	1896.54	4359.96	6188.81	2503.52	3363.46	1943.95	22706.2	10978.6	12123.1	2073.86	3031.88	1268.05	230803	46897.5
APOA2_RAT	3	3	145.9	0.000851864	0.00454997	2.06737	0.957728	Defleshed bone	Fleshed limb	11489	Apolipoprotein A-II OS=Rattus norvegicus OX=10116 GN=Apoa2 PE=2 SV=1	288916	307318	362252	154339	562726	594561	248304	101621	518373	182105	232056	66246.2	730723	210548	750607	622542	531283	584524	485983	794055	812139	529375	802617	627030	156855	216728	215727	92938.2	430284	243164	354963	63735.2	336949	106838	174757	41388.6	589374	96438.8
DUT_RAT	2	2	105.52	0.000922515	0.0047131	5.02579	0.954835	Defleshed bone	Fleshed limb	22274	Deoxyuridine 5'-triphosphate nucleotidohydrolase OS=Rattus norvegicus OX=10116 GN=Dut PE=2 SV=3	251.49	1847.38	3792.34	440.373	1241.05	1189.42	2996.93	3524.08	9555.4	1081.52	1549.45	2722.24	43007.5	7131.25	32371.8	3647.55	27757.2	8664.69	1968.8	5642.08	9822.82	4211.66	4343.4	3168.14	136.536	1302.82	2258.4	265.179	948.957	486.45	4284.27	2210.24	6211.13	634.508	1166.86	1700.77	34688.3	3266.38
ANXA2_RAT	3	3	158.46	0.00120352	0.00541941	3.23668	0.943988	Fleshed limb	Defleshed bone	38939	Annexin A2 OS=Rattus norvegicus OX=10116 GN=Anxa2 PE=1 SV=2	74789.3	63733	44241.9	43757.1	129696	31925.9	223140	241205	196401	160850	193906	245367	107466	126187	120387	58900.9	13517.3	21636	16714.5	8877.18	1379.3	11627.2	10565	12219.7	40603.8	44946	26346.8	26349.1	99170.9	13057.1	318990	151280	127663	94368	146027	153298	86677.7	57798.2
H2B1_RAT;H2B1A_RAT	8	8	563.88	0.00171597	0.00672124	2.04683	0.926347	Defleshed bone	Fleshed limb	13982	Histone H2B type 1 OS=Rattus norvegicus OX=10116 PE=1 SV=2	630374	516520	869344	1.50893e+06	982534	2.74316e+06	1.18491e+06	2.50789e+06	1.2403e+06	559524	577931	203739	2.05322e+06	1.44175e+06	3.83837e+06	1.83615e+06	1.45928e+06	1.07561e+06	1.53175e+06	1.93909e+06	3.77302e+06	2.38954e+06	3.00892e+06	3.33691e+06	342236	364262	517708	908629	751286	1.1219e+06	1.6939e+06	1.5729e+06	806207	328263	435230	127290	1.65605e+06	660378
A1I3_RAT;MUG1_RAT	2	2	73.43	0.00204238	0.00712476	2.58847	0.916212	Defleshed bone	Fleshed limb	165038	Alpha-1-inhibitor 3 OS=Rattus norvegicus OX=10116 GN=A1i3 PE=1 SV=1	9349.71	6840.38	17647.6	4532.83	5595.25	2406.03	25171	10247.5	55497.3	4117.77	5087.72	4703.27	108803	49806.7	35432.8	21280.4	41232.6	31486.5	31412.5	16451.2	22169.1	12394	9839.65	11058	5076.04	4824	10509.4	2729.53	4278.36	984.022	35983.2	6427.08	36073.9	2415.82	3831.47	2938.46	87756.3	22813.4
C1QC_RAT	5	5	191.7	0.00307393	0.00926168	2.07773	0.888162	Defleshed bone	Fleshed limb	25955	Complement C1q subcomponent subunit C OS=Rattus norvegicus OX=10116 GN=C1qc PE=1 SV=2	102741	141718	125959	45040.6	42710.4	39258.9	30056.9	56913.8	47780.7	73485.2	91640.9	71624.5	207681	264004	171241	248115	215114	142501	45733.7	64019.2	136605	72079.7	112792	125519	55778.9	99943	75010.5	27122.1	32658.1	16056.1	42967.9	35695.3	31058	43112.4	69013.2	44748.8	167508	120924
AN32B_RAT	2	2	144.57	0.00428818	0.0114067	3.60422	0.860505	Defleshed bone	Fleshed limb	31213	Acidic leucine-rich nuclear phosphoprotein 32 family member B OS=Rattus norvegicus OX=10116 GN=Anp32b PE=1 SV=1	35669.3	12454.5	26838.4	21859.1	27098.5	35121.8	10520.1	23918.2	36179.1	35317.1	19428.1	9163.59	89385.7	53227.7	56371.7	108504	15370.5	18335.4	374215	175213	23793.1	47991.7	50919.1	44755	19365.2	8783.21	15982.7	13162.9	20720.6	14364.2	15039	15001.1	23516.8	20719.9	14631	5725.14	72095.1	24380.3
HMGB1_RAT	3	2	170.01	0.00439479	0.0114067	9.34473	0.858283	Defleshed bone	Fleshed limb	25049	High mobility group protein B1 OS=Rattus norvegicus OX=10116 GN=Hmgb1 PE=1 SV=2	7916.48	10806.3	9809.48	16528.7	2607.24	5664.34	9935.78	12943.5	33600.2	14953.3	39198.5	16934.6	142698	99800.8	139275	193098	732760	251909	25920.2	15678.5	50782.3	4990.8	5958.4	27575.3	4297.93	7620.87	5841.7	9953.06	1993.6	2316.61	14203.7	8117.92	21840.6	8772.84	29519.7	10580.2	115095	45712.6
MMP13_RAT	9	9	334.78	0.00446536	0.0114067	2.65973	0.856827	Defleshed bone	Fleshed limb	53569	Collagenase 3 (Fragment) OS=Rattus norvegicus OX=10116 GN=Mmp13 PE=1 SV=1	1.65258e+06	1.35089e+06	1.02046e+06	335083	202504	137826	164805	527918	391706	780570	1.06062e+06	433845	1.44738e+06	2.93037e+06	768217	1.17487e+06	5.41567e+06	1.6956e+06	623007	980143	2.06994e+06	502648	717257	3.10916e+06	897202	952680	607699	201776	154843	56368.3	235597	331101	254613	457946	798733	271053	1.1674e+06	1.34222e+06
HS90B_RAT;TRAP1_RAT	7	3	371.83	0.00565404	0.0132877	3.02711	0.833982	Defleshed bone	Fleshed limb	83571	Heat shock protein HSP 90-beta OS=Rattus norvegicus OX=10116 GN=Hsp90ab1 PE=1 SV=4	41768.8	29447.4	37901.8	32986.4	27394.6	30497.6	18798.9	33130	77625.3	34204.2	36475.5	21556.7	136528	72096.6	86871.6	199326	227016	259823	15987.1	18047.2	94315.2	56370.1	50887.5	59528.2	22676.7	20767	22571.1	19863.3	20947	12473	26874	20778.6	50457.4	20067	27469.1	13468	110118	33023
SET_RAT	2	2	59.89	0.0066588	0.0142816	2.89013	0.816709	Defleshed bone	Fleshed limb	33386	Protein SET OS=Rattus norvegicus OX=10116 GN=Set PE=2 SV=2	8823.57	13794.4	7419.5	20071.4	15286.6	21101.4	43968.2	54683.1	65724.4	9080.76	9814.15	3288.62	200299	6377.65	102966	115544	81201.4	31679.9	36436.1	21966.9	72905.6	32890.9	37960.2	48939.6	4790.4	9728.15	4418.43	12086.4	11688.8	8630.1	62854.8	34296.3	42721.6	5327.51	7390.86	2054.63	161554	2921.21
CHAD_RAT	8	8	420.74	0.00893182	0.0169281	3.42948	0.782666	Defleshed bone	Fleshed limb	40892	Chondroadherin OS=Rattus norvegicus OX=10116 GN=Chad PE=2 SV=1	474892	391354	1.06924e+06	769853	262915	871047	566591	584576	764227	272438	240225	232211	1.36446e+06	994251	1.59776e+06	1.45578e+06	8.2973e+06	3.25185e+06	413962	566432	508886	318937	800219	2.72031e+06	257823	275992	636752	463581	201035	356242	809971	366636	496756	159834	180909	145078	1.10052e+06	455405
DMP1_RAT	7	7	323.96	0.0102251	0.0187736	4.65634	0.765671	Defleshed bone	Fleshed limb	53141	Dentin matrix acidic phosphoprotein 1 OS=Rattus norvegicus OX=10116 GN=Dmp1 PE=2 SV=1	6.81762e+06	4.75844e+06	1.06941e+07	1.44077e+06	1.52835e+06	1.48931e+06	1.10083e+06	4.2049e+06	2.28375e+06	2.9663e+06	4.95953e+06	3.15747e+06	3.39803e+07	3.82767e+07	1.22276e+07	3.57922e+07	3.69513e+07	2.29572e+07	1.42742e+06	1.67325e+06	5.83564e+06	2.96302e+06	2.6107e+06	1.67091e+07	3.70135e+06	3.35577e+06	6.36853e+06	867586	1.16864e+06	609098	1.57369e+06	2.63724e+06	1.48446e+06	1.74028e+06	3.73494e+06	1.97269e+06	2.74072e+07	1.75322e+07
SIAL_RAT	11	11	424.5	0.0150919	0.023334	2.46304	0.712117	Defleshed bone	Fleshed limb	35287	Bone sialoprotein 2 OS=Rattus norvegicus OX=10116 GN=Ibsp PE=1 SV=1	521978	298013	367311	106148	98056	72204.9	57790	88982.1	55137.2	171133	294946	287876	304321	708717	328410	266191	2.29776e+06	522591	147150	127689	262827	266552	278419	448891	283387	210166	218740	63919.2	74977.7	29530.5	82613.8	55808.1	35839.8	100401	222119	179857	245454	324619
PDIA4_RAT	3	3	89.65	0.015333	0.023399	3.79553	0.709793	Defleshed bone	Fleshed limb	73017	Protein disulfide-isomerase A4 OS=Rattus norvegicus OX=10116 GN=Pdia4 PE=1 SV=2	18343.5	13862.3	17152.3	16037.9	10525.6	11484.6	7974.87	18582.8	26469.1	10548.6	11128.1	3709.59	88572.5	41028.4	41629.8	132651	182584	33451.5	4234.34	5865.44	23176.6	16938.1	25364.2	33877.3	9958.84	9776.03	10214.5	9657.51	8048.32	4697	11400.5	11654.8	17205.2	6188.69	8380.41	2317.64	71439.3	18792.6
SLIT3_RAT	6	6	262.96	0.01643	0.0243143	2.33976	0.699537	Defleshed bone	Fleshed limb	173703	Slit homolog 3 protein OS=Rattus norvegicus OX=10116 GN=Slit3 PE=2 SV=1	36104.6	24237.3	75362.4	14255.9	13518.6	39206.2	65333.7	105418	113058	12834.7	18752.5	3573.1	208177	130648	169018	223391	153248	76563.7	24097.3	35249.7	68760	21580.8	47468.8	62343.4	19601.5	17092.7	44879.5	8584.48	10336.9	16034.6	93397.8	66116.5	73489.3	7529.91	14122.2	2232.36	167908	59842
PRG2_RAT	2	2	72.06	0.0183458	0.0259728	2.41381	0.68274	Defleshed bone	Fleshed limb	25569	Bone marrow proteoglycan OS=Rattus norvegicus OX=10116 GN=Prg2 PE=2 SV=1	81107.7	260833	9411.41	31077.2	50487.4	18032.6	95728	81662	41982.2	127445	14320.1	44978.8	203262	419581	369752	145426	46971.8	40298.4	35032.7	69805.5	120817	248951	289117	79780.3	44034.1	183946	5604.65	18713.7	38604.7	7375	136848	51217	27288.9	74769.4	10784.2	28101.4	163943	192184
LAC2_RAT	3	3	120.64	0.0189585	0.0264838	2.71031	0.677639	Defleshed bone	Fleshed limb	11482	Ig lambda-2 chain C region OS=Rattus norvegicus OX=10116 PE=4 SV=1	76345.8	41103	55878.1	38376.1	85780.9	72734.7	92474.1	87583.4	94949.8	27750.8	32343.8	19759.2	273470	86389.8	140133	96826.6	40346.8	12727.7	99991	97174.5	200694	390574	286718	240144	41448.8	28986.8	33276.3	23108.9	65591.6	29747.2	132196	54930.8	61718.5	16280.9	24357.6	12345	220571	39569.8
GELS_RAT	4	4	192.45	0.0191575	0.0264838	2.1426	0.676007	Defleshed bone	Fleshed limb	86413	Gelsolin OS=Rattus norvegicus OX=10116 GN=Gsn PE=1 SV=1	16415.3	34098	59554.2	17684.7	19157.7	48324.8	45149.7	39232.5	64936.8	17668.2	10541.8	1896.68	158419	74307.4	109104	117280	60806.3	24163.3	20309.3	31652.2	28506.2	35749.2	73386.7	69065.8	8912	24046.7	35465.5	10649.1	14648.7	19764	64543.8	24606	42209.7	10365.6	7938.87	1184.99	127775	34035.6
PRVA_RAT	4	4	158.04	0.0199135	0.0272088	2.87296	0.669922	Fleshed limb	Defleshed bone	11918	Parvalbumin alpha OS=Rattus norvegicus OX=10116 GN=Pvalb PE=1 SV=2	306343	158503	61837.3	409310	416867	365436	35439.5	26688.7	143537	61646.3	49356.3	53226.7	32387.1	24787.1	41860.2	36246.4	18529.8	23414.8	57822.6	43335.9	16769.3	133047	100710	197933	166316	111780	36825.1	246474	318754	149457	50662.6	16738.7	93300.5	36166.7	37169.4	33254.4	26122.2	11353.4
PCSK6_RAT	2	2	77.48	0.0293178	0.0355157	2.39595	0.605867	Defleshed bone	Fleshed limb	107122	Proprotein convertase subtilisin/kexin type 6 OS=Rattus norvegicus OX=10116 GN=Pcsk6 PE=1 SV=1	9901.8	21583.7	83057.3	16737.1	17269.1	38172.5	86920.1	58838.9	105448	13170.6	10941.4	905.901	152904	68237.7	88437.2	202007	235116	155427	13834	23246.5	37943.3	26405.4	42148.3	63492.1	5375.78	15221.3	49462	10078.6	13204.7	15611.9	124257	36902.7	68542.7	7726.93	8239.81	565.98	123327	31255.5
MYH4_RAT;MYH3_RAT;MYH6_RAT;MYH7_RAT	12	12	612.69	0.0355484	0.0412265	8.21574	0.57195	Fleshed limb	Defleshed bone	223653	Myosin-4 OS=Rattus norvegicus OX=10116 GN=Myh4 PE=1 SV=1	18071.7	27110.9	9397.21	12160	16750.6	20875.9	355464	116180	625733	174081	911065	538351	19911.1	8652.39	19205	12985	60985.4	61158.3	23338.2	49959.9	37471.8	13827.3	10206.2	26180.9	9811.3	19119.3	5596.19	7322.36	12808.2	8537.84	508153	72865.9	406734	102130	686107	336345	16059.5	3963.13
[truncated: 31 more columns]

## Sheet: Fleshed vs whole
Protein export fleshed vs whole												Normalized abundance																								Raw abundance
												Fleshed limb												Whole body												Fleshed limb												Whole body
Accession	Peptide count	Unique peptides	Confidence score	Anova (p)	q Value	Max fold change	Power	Highest mean condition	Lowest mean condition	Mass	Description	NP-7	NP-8	NP-9	NP-16	NP-17	NP-18	NP-19	NP-20	NP-21	NP-22	NP-23	NP-24	NP-1	NP-2	NP-3	NP-13	NP-14	NP-15	NP-31	NP-32	NP-33	NP-37	NP-38	NP-39	NP-7	NP-8	NP-9	NP-16	NP-17	NP-18	NP-19	NP-20	NP-21	NP-22	NP-23	NP-24	NP-1	NP-2
PPIB_RAT	2	2	89.85	4.55991e-06	0.000597853	2.84334	0.999925	Fleshed limb	Whole body	23845	Peptidyl-prolyl cis-trans isomerase B OS=Rattus norvegicus OX=10116 GN=Ppib PE=1 SV=3	99964.5	44207.9	59872.9	45891.1	47362.6	88975.2	31598.3	53473.2	33839.2	41827.3	36757.5	36135.4	36123.6	27101.5	28051	22001.3	20537.3	14762.5	13977.1	14430.7	10583	15212.6	6072.98	9166.09	54271.6	31176.4	35655.3	27634.2	36215.4	36389.2	45171.4	33537.5	21995.9	24539.3	27681.4	22576.3	33966.4	19350.1
APOA2_RAT	3	3	145.9	7.99206e-05	0.00345302	2.7735	0.995958	Whole body	Fleshed limb	11489	Apolipoprotein A-II OS=Rattus norvegicus OX=10116 GN=Apoa2 PE=2 SV=1	288916	307318	362252	154339	562726	594561	248304	101621	518373	182105	232056	66246.2	1.64021e+06	522724	318755	806533	838721	725614	650084	525137	855085	1.30487e+06	797788	1.05126e+06	156855	216728	215727	92938.2	430284	243164	354963	63735.2	336949	106838	174757	41388.6	1.54226e+06	373217
EF1A2_RAT;EF1A1_RAT	2	2	90.15	0.00180291	0.0299599	2.48103	0.923574	Fleshed limb	Whole body	50764	Elongation factor 1-alpha 2 OS=Rattus norvegicus OX=10116 GN=Eef1a2 PE=1 SV=1	9972.11	7900.66	2793.6	4115.49	11376.3	8256.68	13682.3	14867.4	5570.09	12140.8	12579	27200.1	10790.7	3230.06	12671	14206.9	458.913	2926.75	840.207	1260.25	570.79	1429.93	3668.96	526.409	5413.95	5571.73	1663.63	2478.22	8698.8	3376.83	19559.5	9324.55	3620.62	7122.81	9473.06	16993.8	10146.3	2306.21
IBP1_RAT	2	2	117.88	0.00201713	0.0311254	2.12226	0.916971	Fleshed limb	Whole body	30691	Insulin-like growth factor-binding protein 1 OS=Rattus norvegicus OX=10116 GN=Igfbp1 PE=1 SV=2	161225	147827	382261	235801	175690	148456	448469	327086	153191	206981	119015	65967.2	73352.6	155369	43172.6	106206	61156.5	116947	42772.9	71015.6	113881	157970	122857	147202	87530.5	104251	227642	141992	134340	60715.6	641109	205143	99575.7	121432	89628.2	41214.3	68972.1	110931
ANXA2_RAT	3	3	158.46	0.00304183	0.0373247	2.64116	0.888961	Fleshed limb	Whole body	38939	Annexin A2 OS=Rattus norvegicus OX=10116 GN=Anxa2 PE=1 SV=2	74789.3	63733	44241.9	43757.1	129696	31925.9	223140	241205	196401	160850	193906	245367	58729.6	68796.1	48714.9	33682.7	28495.7	28257.8	17419.4	142402	106903	36623.8	32769.3	21558.2	40603.8	44946	26346.8	26349.1	99170.9	13057.1	318990	151280	127663	94368	146027	153298	55222.4	49119.4
RIPR2_RAT	2	2	51.95	0.00351924	0.0373247	2.44869	0.877468	Whole body	Fleshed limb	145987	Rho family-interacting cell polarization regulator 2 OS=Rattus norvegicus OX=10116 GN=Ripor2 PE=1 SV=1	15076.6	30978.9	5355.64	7260.57	14423.7	6758.06	23137	20059.2	13478.1	19908.7	6477.11	9199.85	37934.7	22871.1	24286.9	19280	10310.4	15333.4	15211.1	37922.7	28714.4	121877	47943.1	39767.5	8185.24	21847.1	3189.37	4372.09	11028.9	2763.92	33075.5	12580.8	8760.94	11680.1	4877.8	5747.79	35669.3	16329.6
ILEUA_RAT	3	3	130.98	0.00389326	0.0382297	4.42807	0.869001	Whole body	Fleshed limb	42871	Leukocyte elastase inhibitor A OS=Rattus norvegicus OX=10116 GN=Serpinb1a PE=1 SV=1	3493.29	6182.38	10392.4	4157.51	4398.74	4753.15	15883.5	17504.6	18650.7	3534.9	4025.97	2029.63	14006.2	4802.53	13590	6846.85	6804.89	5494.63	42379.6	40840.8	43592.3	104397	74418.2	63522.6	1896.54	4359.96	6188.81	2503.52	3363.46	1943.95	22706.2	10978.6	12123.1	2073.86	3031.88	1268.05	13169.8	3428.93
VDAC1_RAT	5	5	212.08	0.00560528	0.0455611	5.63447	0.834863	Fleshed limb	Whole body	30851	Voltage-dependent anion-selective channel protein 1 OS=Rattus norvegicus OX=10116 GN=Vdac1 PE=1 SV=4	29923.2	140724	8770.78	61982.5	488006	62482.4	119821	73385.5	53494.9	324161	912695	288966	87789.7	78278.3	52910.8	36301.1	7564.38	9984.71	58536.5	50664.5	65057.9	2153.72	2860.12	3027.4	16245.6	99241.6	5223.14	37323.9	373150	25554.1	171290	46026.1	34772.3	190179	687335	180537	82547	55889.5
MYH4_RAT;MYH3_RAT;MYH6_RAT;MYH7_RAT	12	12	612.69	0.0056944	0.0455611	13.7988	0.833256	Fleshed limb	Whole body	223653	Myosin-4 OS=Rattus norvegicus OX=10116 GN=Myh4 PE=1 SV=1	18071.7	27110.9	9397.21	12160	16750.6	20875.9	355464	116180	625733	174081	911065	538351	17315.3	11647.1	12824.7	16576.1	19566	10388.6	19661.2	14003.8	15380.3	23610	20481	23291.3	9811.3	19119.3	5596.19	7322.36	12808.2	8537.84	508153	72865.9	406734	102130	686107	336345	16281.2	8315.85
PRG2_RAT	2	2	72.06	0.00664765	0.04952	4.10026	0.816892	Whole body	Fleshed limb	25569	Bone marrow proteoglycan OS=Rattus norvegicus OX=10116 GN=Prg2 PE=2 SV=1	81107.7	260833	9411.41	31077.2	50487.4	18032.6	95728	81662	41982.2	127445	14320.1	44978.8	137063	128785	117352	74626.2	37053.2	51960.1	55975.4	298944	660388	317215	1.18915e+06	445677	44034.1	183946	5604.65	18713.7	38604.7	7375	136848	51217	27288.9	74769.4	10784.2	28101.4	128878	91950.6
CYC_RAT	2	2	73.18	0.00817724	0.0535307	2.03887	0.79331	Fleshed limb	Whole body	11712	Cytochrome c, somatic OS=Rattus norvegicus OX=10116 GN=Cycs PE=1 SV=2	11347.7	8471.2	17872	7580.05	12947.7	22748.4	22981	23351.1	21789	21414.4	11759	19577.9	18803.8	10666	6617.3	11150.6	12979.8	13179.1	1268.17	444.706	530.037	7066.25	2870.88	13419	6160.75	5974.09	10643.1	4564.47	9900.37	9303.67	32852.5	14645.4	14163.1	12563.4	8855.47	12231.7	17680.9	7615.37
ACTC_RAT;ACTA_RAT	3	3	128.73	0.00865006	0.0549604	2.09692	0.786573	Whole body	Fleshed limb	42334	Actin, alpha cardiac muscle 1 OS=Rattus norvegicus OX=10116 GN=Actc1 PE=2 SV=1	47788.8	61031.4	68549.1	64102.2	78651	101951	104931	103437	230331	43784.7	52380	33766.3	132665	78253.2	71593.8	110936	109137	85259.6	119579	103573	127307	358869	297677	482579	25945	43040.8	40822.1	38600.3	60139.8	41696	150004	64873.9	149718	25687.6	39446.5	21096.2	124742	55871.6
H2B1_RAT;H2B1A_RAT	8	8	563.88	0.0101408	0.0570121	2.66875	0.766735	Whole body	Fleshed limb	13982	Histone H2B type 1 OS=Rattus norvegicus OX=10116 PE=1 SV=2	630374	516520	869344	1.50893e+06	982534	2.74316e+06	1.18491e+06	2.50789e+06	1.2403e+06	559524	577931	203739	1.90954e+06	771202	353268	1.6207e+06	2.82044e+06	2.53696e+06	3.68135e+06	5.39844e+06	7.63833e+06	1.62951e+06	2.00194e+06	5.73355e+06	342236	364262	517708	908629	751286	1.1219e+06	1.6939e+06	1.5729e+06	806207	328263	435230	127290	1.7955e+06	550627
PCSK1_RAT;PCS1N_RAT	2	2	112.67	0.0121176	0.0654436	2.54586	0.743148	Whole body	Fleshed limb	27455	ProSAAS OS=Rattus norvegicus OX=10116 GN=Pcsk1n PE=1 SV=1	4428.8	5337.59	10730.9	11475.5	24926.2	27141	29765.7	15689.9	31797.8	5219.39	2721.44	3250.42	24628.9	24661.4	4140.94	26797.9	13987.4	14397.1	42545.4	41651.4	24001.4	57667.1	40172.5	124471	2404.44	3764.19	6390.41	6910.21	19059.6	11100.2	42551.6	9840.42	20669	3062.12	2049.47	2030.76	23158.1	17607.9
MBL1_RAT	2	2	53.63	0.0138619	0.0683919	3.6967	0.72439	Whole body	Fleshed limb	25748	Mannose-binding protein A OS=Rattus norvegicus OX=10116 GN=Mbl1 PE=1 SV=1	4352.88	23916.5	17535.3	10433.2	7042.7	32255	6419.86	11748.8	6204.66	15039.1	10492.9	14192.3	27270.1	55903.8	176595	25136.5	122607	69742.6	5554.3	5415.33	10226.9	26648.6	25209	39807	2363.22	16866.5	10442.5	6282.54	5385.14	13191.7	9177.52	7368.63	4033.1	8823.17	7902.04	8866.95	25641.6	39914.5
FGFR1_RAT	2	2	81.09	0.0148026	0.0710616	2.10159	0.714939	Whole body	Fleshed limb	92792	Fibroblast growth factor receptor 1 OS=Rattus norvegicus OX=10116 GN=Fgfr1 PE=1 SV=1	40526.5	41001.1	26554	107343	67258.6	43457	50199.6	78040.2	46637.9	40191.1	25523.9	30492.8	38916.4	51910	23597.2	54411.7	78264.1	67399.7	81020.5	128998	173464	184786	124631	247727	22002.2	28914.9	15813.3	64638.4	51428.7	17773.1	71762.8	48945.5	30315.2	23579.4	19221.6	19051	36592.4	37063
COX5A_RAT	4	4	184.24	0.0158194	0.0742921	2.1704	0.705183	Fleshed limb	Whole body	16347	Cytochrome c oxidase subunit 5A, mitochondrial OS=Rattus norvegicus OX=10116 GN=Cox5a PE=1 SV=1	106803	207391	56064.6	47386.1	211708	79168.2	189320	172626	185749	444846	1.0789e+06	375177	49346.1	18651.7	19143.6	23589.2	17183.7	15701.8	612098	264919	212544	66603	36188.8	117743	57984.2	146257	33387.4	28534.4	161881	32378.3	270642	108268	120739	260983	812498	234399	46399.3	13317
TPM1_RAT	9	2	451.58	0.0211837	0.0915256	2.54699	0.660072	Fleshed limb	Whole body	32718	Tropomyosin alpha-1 chain OS=Rattus norvegicus OX=10116 GN=Tpm1 PE=1 SV=3	17384.6	16591.5	15232.3	29553.5	22288.6	72157.9	31639.2	17559.7	36246.1	28292.2	57805	220435	37162.5	16315.7	36102.3	16046	26415.8	7650.16	9655.92	9476.35	1552.49	35493.4	14747.2	11285.3	9438.24	11700.7	9071.06	17796.2	17042.8	29511.2	45229.8	11013.1	23560.4	16598.5	43531.9	137721	34943.2	11649.2
APOE_RAT	49	48	2521.97	0.0316722	0.112165	2.18159	0.592418	Whole body	Fleshed limb	35788	Apolipoprotein E OS=Rattus norvegicus OX=10116 GN=Apoe PE=1 SV=2	1.84404e+07	2.40039e+07	1.7768e+07	5.469e+06	6.09906e+06	6.22827e+06	8.05241e+06	1.21284e+07	6.43634e+06	6.49743e+06	6.56773e+06	689863	1.0424e+07	2.89375e+07	1.39253e+07	8.30256e+06	5.33899e+06	6.55474e+06	7.9279e+06	1.85013e+07	4.93708e+07	3.96319e+07	3.54073e+07	3.39363e+07	1.00114e+07	1.69281e+07	1.05812e+07	3.29326e+06	4.66359e+06	2.54725e+06	1.15113e+07	7.60672e+06	4.1837e+06	3.81192e+06	4.94604e+06	431005	9.80146e+06	2.06609e+07
GRZ2_RAT	7	5	409.86	0.0376176	0.124153	3.56758	0.561768	Whole body	Fleshed limb	27901	Granzyme-like protein 2 OS=Rattus norvegicus OX=10116 GN=Mcpt10 PE=2 SV=1	2964.95	15978.5	3082.98	11516.8	11511.8	8159.29	57263.9	49794.7	57617.4	23735.5	25301.2	17605.6	19265.6	9598.12	6766.61	21664.8	15287.7	17388.1	178510	126603	207381	163746	86105.6	162777	1609.7	11268.4	1835.96	6935.04	8802.39	3337	81861.6	31230.4	37452	13925.2	19053.9	10999.5	18115.1	6852.91
A1I3_RAT;MUG1_RAT	2	2	73.43	0.0385053	0.124153	3.49968	0.557543	Whole body	Fleshed limb	165038	Alpha-1-inhibitor 3 OS=Rattus norvegicus OX=10116 GN=A1i3 PE=1 SV=1	9349.71	6840.38	17647.6	4532.83	5595.25	2406.03	25171	10247.5	55497.3	4117.77	5087.72	4703.27	11781.9	4385.97	3647.54	4417.05	11105.6	13825.1	70722.2	46698.3	65744.2	105070	39872	151869	5076.04	4824	10509.4	2729.53	4278.36	984.022	35983.2	6427.08	36073.9	2415.82	3831.47	2938.46	11078.3	3131.52
SIAL_RAT	11	11	424.5	0.0472963	0.135455	4.25099	0.519654	Whole body	Fleshed limb	35287	Bone sialoprotein 2 OS=Rattus norvegicus OX=10116 GN=Ibsp PE=1 SV=1	521978	298013	367311	106148	98056	72204.9	57790	88982.1	55137.2	171133	294946	287876	69814.1	198734	411814	95764.8	157758	188375	200589	303627	1.03955e+06	1.09379e+06	1.69437e+06	4.83142e+06	283387	210166	218740	63919.2	74977.7	29530.5	82613.8	55808.1	35839.8	100401	222119	179857	65645	141893
[truncated: 31 more columns]

## Sheet: Defleshed vs whole
	Protein export defleshed vs whole											Normalized abundance																								Raw abundance
												Defleshed bone												Whole body												Defleshed bone												Whole body
Accession	Peptide count	Unique peptides	Confidence score	Anova (p)	q Value	Max fold change	Power	Highest mean condition	Lowest mean condition	Mass	Description	NP-4	NP-5	NP-6	NP-10	NP-11	NP-12	NP-28	NP-29	NP-30R	NP-34	NP-35	NP-36	NP-1	NP-2	NP-3	NP-13	NP-14	NP-15	NP-31	NP-32	NP-33	NP-37	NP-38	NP-39	NP-4	NP-5	NP-6	NP-10	NP-11	NP-12	NP-28	NP-29	NP-30R	NP-34	NP-35	NP-36	NP-1	NP-2
HS90A_RAT	6	3	291.76	0.000496946	0.109081	2.66705	0.973546	Defleshed bone	Whole body	85161	Heat shock protein HSP 90-alpha OS=Rattus norvegicus OX=10116 GN=Hsp90aa1 PE=1 SV=3	81001.8	56028.2	67385.2	100709	112104	176842	24061	27842.1	136853	76717.2	70420.5	65595.6	32289.3	25798.3	66442.5	25971.3	49657	33087.1	10470	12469.8	9677.92	50464	26312.9	30640.9	65333	25663.1	34271.7	56602.3	37095.4	58979.3	19519.9	23836.6	61016.4	38524	23401.3	21690.8	30361	18419.6
HS90B_RAT;TRAP1_RAT	7	3	371.83	0.00416013	0.219654	3.16165	0.863213	Defleshed bone	Whole body	83571	Heat shock protein HSP 90-beta OS=Rattus norvegicus OX=10116 GN=Hsp90ab1 PE=1 SV=4	136528	72096.6	86871.6	199326	227016	259823	15987.1	18047.2	94315.2	56370.1	50887.5	59528.2	30391.9	21250.5	74683.4	16349.6	34213.9	18754.9	5665.7	7837.52	5660.07	102191	41475.1	45365.1	110118	33023	44182.3	112029	75119.6	86654.6	12969.8	15450.8	42050.8	28306.6	16910.3	19684.5	28577	15172.5
ANXA1_RAT	20	20	854.92	0.00741559	0.219654	8.3714	0.804686	Whole body	Defleshed bone	39147	Annexin A1 OS=Rattus norvegicus OX=10116 GN=Anxa1 PE=1 SV=2	202338	257521	189125	53018.6	138541	94556.6	68693	73295.1	50708.4	49374.1	50463.6	42186.9	329162	315324	135926	207532	83952.4	69230.5	2.86918e+06	3.27548e+06	2.87395e+06	179203	91211.2	200043	163199	117954	96187.7	29798.4	45843.3	31535.9	55728.5	62750.5	22608.5	24793.5	16769.5	13950.2	309505	225137
ENOB_RAT;ENOG_RAT	3	3	184.69	0.0100069	0.219654	2.21631	0.768437	Defleshed bone	Whole body	47326	Beta-enolase OS=Rattus norvegicus OX=10116 GN=Eno3 PE=1 SV=3	19969.2	9169.41	28716.6	37703.2	2248.02	3690.35	14568	10696.3	11732.8	4815.57	12104.7	4057.35	9870.53	873.424	764.866	10480.3	1739	5650.16	1310.9	1508.15	266.931	1836.89	5381.51	32270.8	16106.4	4199.94	14605.1	21190.6	743.87	1230.78	11818.5	9157.49	5231.13	2418.17	4022.49	1341.66	9281.08	623.612
PPIB_RAT	2	2	89.85	0.0124655	0.248745	2.02077	0.739268	Defleshed bone	Whole body	23845	Peptidyl-prolyl cis-trans isomerase B OS=Rattus norvegicus OX=10116 GN=Ppib PE=1 SV=3	44980.8	57416.4	62114.2	31611	6804.12	12007.8	32639	19848.9	41020.9	50489.7	35787.6	45847.1	36123.6	27101.5	28051	22001.3	20537.3	14762.5	13977.1	14430.7	10583	15212.6	6072.98	9166.09	36279.9	26298.9	31590.9	17766.6	2251.49	4004.77	26479	16993.4	18289.3	25353.8	11892.5	15160.5	33966.4	19350.1
G3P_RAT;G3PT_RAT	3	3	156.79	0.0181032	0.30072	2.23193	0.684795	Defleshed bone	Whole body	36090	Glyceraldehyde-3-phosphate dehydrogenase OS=Rattus norvegicus OX=10116 GN=Gapdh PE=1 SV=3	43282.7	1692.6	15716.9	44801.3	40033.6	22030.4	20353.3	18985.2	17274.5	15684.1	13490.1	7814.75	6734.83	1300.19	2840.72	6951.84	24506.1	1675.79	6217.56	6676.63	2654.54	17829.8	7678.23	31944.6	34910.2	775.273	7993.51	25180	13247.1	7347.44	16512	16253.9	7701.9	7875.89	4482.89	2584.14	6332.64	928.319
RPN1_RAT	2	2	106.18	0.0188741	0.30072	8.26776	0.678334	Whole body	Defleshed bone	68376	Dolichyl-diphosphooligosaccharide--protein glycosyltransferase subunit 1 OS=Rattus norvegicus OX=10116 GN=Rpn1 PE=2 SV=1	1439.2	892.328	1788.84	1065.11	1365.1	4278.13	5386.58	7331.92	668.61	1444.04	284.599	937.47	6343.86	1152.48	1359.18	3402.25	3841.95	4560.33	111957	44692.5	37532.4	4657.76	1209.51	1544	1160.8	408.72	909.792	598.631	451.711	1426.82	4369.96	6277.11	298.102	725.135	94.5746	309.998	5965.02	822.856
ANXA3_RAT	3	3	109.69	0.0246434	0.3258	9.62726	0.635335	Whole body	Defleshed bone	36569	Annexin A3 OS=Rattus norvegicus OX=10116 GN=Anxa3 PE=1 SV=4	455.957	830.014	1040.1	2606.91	5619.75	2501.54	2464.6	6873.09	5764.82	3374.15	1113.16	968.536	9120.63	10757.8	4132.48	3456.69	1268.53	5250.24	73503.1	110298	100780	2054.53	1366.51	1609.6	367.758	380.178	528.99	1465.18	1859.58	834.298	1999.46	5884.29	2570.27	1694.35	369.911	320.271	8575.97	7680.89
AN32B_RAT	2	2	144.57	0.0289162	0.3258	2.71421	0.608247	Defleshed bone	Whole body	31213	Acidic leucine-rich nuclear phosphoprotein 32 family member B OS=Rattus norvegicus OX=10116 GN=Anp32b PE=1 SV=1	89385.7	53227.7	56371.7	108504	15370.5	18335.4	374215	175213	23793.1	47991.7	50919.1	44755	23415.4	32471.3	32493.1	15984.5	28800.6	24816.4	9802.09	24447.5	29148.3	74454.8	21614.9	72381	72095.1	24380.3	28670.3	60983.5	5086.12	6115.13	303589	150006	10608.2	24099.4	16920.8	14799.4	22017.1	23184
ALDOA_RAT;ALDOB_RAT	3	3	176.26	0.0294757	0.3258	2.55427	0.604938	Defleshed bone	Whole body	39783	Fructose-bisphosphate aldolase A OS=Rattus norvegicus OX=10116 GN=Aldoa PE=1 SV=2	33695.8	47142.7	60724.8	127635	8484.1	11850.1	44205.2	34447.1	18459.8	4782.1	12237.5	7642.67	11521.5	3099.8	41901.7	7192.07	17230.4	4784.48	5152.59	3559.7	6234.38	8065	13006.1	39279.6	27177.8	21593.1	30884.3	71735.7	2807.39	3952.18	35862.3	29491.3	8230.36	2401.36	4066.63	2527.24	10833.5	2213.21
HPLN1_RAT	8	8	336.42	0.0416913	0.3258	2.80597	0.543027	Defleshed bone	Whole body	40863	Hyaluronan and proteoglycan link protein 1 OS=Rattus norvegicus OX=10116 GN=Hapln1 PE=1 SV=2	198192	649112	195049	116798	3.37003e+06	461435	141208	230249	360193	38920.2	43873.7	45450.9	48857.6	166969	1.25059e+06	32220.1	40719.1	18534.7	23312	43831.3	21826.7	245873	170234	22048.1	159855	297318	99200.9	65644.9	1.11514e+06	153895	114558	197124	160593	19544	14579.6	15029.5	45939.9	119214
[truncated: 31 more columns]

## Sheet: Buried vs exposed
Protein export buried vs exposed												Normalized abundance																																				Raw abundance
												EXPOSED																								BURIED												EXPOSED
Accession	Peptide count	Unique peptides	Confidence score	Anova (p)	q Value	Max fold change	Power	Highest mean condition	Lowest mean condition	Mass	Description	NP-1	NP-2	NP-3	NP-7	NP-8	NP-9	NP-13	NP-14	NP-15	NP-16	NP-17	NP-18	NP-19	NP-20	NP-21	NP-22	NP-23	NP-24	NP-31	NP-32	NP-33	NP-37	NP-38	NP-39	NP-4	NP-5	NP-6	NP-10	NP-11	NP-12	NP-28	NP-29	NP-30R	NP-34	NP-35	NP-36	NP-1	NP-2
HS90A_RAT	6	3	291.76	4.50442e-06	0.000677356	2.82348	0.999868	BURIED	EXPOSED	85161	Heat shock protein HSP 90-alpha OS=Rattus norvegicus OX=10116 GN=Hsp90aa1 PE=1 SV=3	32289.3	25798.3	66442.5	42370.8	22851.2	24156.4	25971.3	49657	33087.1	34769.2	27577.5	38523	18120.7	25027.8	36315	30928.3	17553.4	13727	10470	12469.8	9677.92	50464	26312.9	30640.9	81001.8	56028.2	67385.2	100709	112104	176842	24061	27842.1	136853	76717.2	70420.5	65595.6	30361	18419.6
ANXA1_RAT	20	20	854.92	0.000160385	0.012059	8.17098	0.992031	EXPOSED	BURIED	39147	Annexin A1 OS=Rattus norvegicus OX=10116 GN=Anxa1 PE=1 SV=2	329162	315324	135926	649332	1.26849e+06	96124.3	207532	83952.4	69230.5	134304	908472	152749	1.37464e+06	1.50341e+06	1.20967e+06	1.16139e+06	433665	1.22895e+06	2.86918e+06	3.27548e+06	2.87395e+06	179203	91211.2	200043	202338	257521	189125	53018.6	138541	94556.6	68693	73295.1	50708.4	49374.1	50463.6	42186.9	309505	225137
RPN1_RAT	2	2	106.18	0.000319438	0.0160119	7.45871	0.984805	EXPOSED	BURIED	68376	Dolichyl-diphosphooligosaccharide--protein glycosyltransferase subunit 1 OS=Rattus norvegicus OX=10116 GN=Rpn1 PE=2 SV=1	6343.86	1152.48	1359.18	8146.59	29446.5	1304.38	3402.25	3841.95	4560.33	8091.25	5743.81	8983.59	23858.5	32325.1	9247.69	16902.9	13359.7	21345.5	111957	44692.5	37532.4	4657.76	1209.51	1544	1439.2	892.328	1788.84	1065.11	1365.1	4278.13	5386.58	7331.92	668.61	1444.04	284.599	937.47	5965.02	822.856
HS90B_RAT;TRAP1_RAT	7	3	371.83	0.000725792	0.0272854	3.09292	0.969076	BURIED	EXPOSED	83571	Heat shock protein HSP 90-beta OS=Rattus norvegicus OX=10116 GN=Hsp90ab1 PE=1 SV=4	30391.9	21250.5	74683.4	41768.8	29447.4	37901.8	16349.6	34213.9	18754.9	32986.4	27394.6	30497.6	18798.9	33130	77625.3	34204.2	36475.5	21556.7	5665.7	7837.52	5660.07	102191	41475.1	45365.1	136528	72096.6	86871.6	199326	227016	259823	15987.1	18047.2	94315.2	56370.1	50887.5	59528.2	28577	15172.5
AN32B_RAT	2	2	144.57	0.00131218	0.03329	3.09653	0.950331	BURIED	EXPOSED	31213	Acidic leucine-rich nuclear phosphoprotein 32 family member B OS=Rattus norvegicus OX=10116 GN=Anp32b PE=1 SV=1	23415.4	32471.3	32493.1	35669.3	12454.5	26838.4	15984.5	28800.6	24816.4	21859.1	27098.5	35121.8	10520.1	23918.2	36179.1	35317.1	19428.1	9163.59	9802.09	24447.5	29148.3	74454.8	21614.9	72381	89385.7	53227.7	56371.7	108504	15370.5	18335.4	374215	175213	23793.1	47991.7	50919.1	44755	22017.1	23184
ANXA2_RAT	3	3	158.46	0.00271379	0.036181	2.23108	0.915	EXPOSED	BURIED	38939	Annexin A2 OS=Rattus norvegicus OX=10116 GN=Anxa2 PE=1 SV=2	58729.6	68796.1	48714.9	74789.3	63733	44241.9	33682.7	28495.7	28257.8	43757.1	129696	31925.9	223140	241205	196401	160850	193906	245367	17419.4	142402	106903	36623.8	32769.3	21558.2	107466	126187	120387	58900.9	13517.3	21636	16714.5	8877.18	1379.3	11627.2	10565	12219.7	55222.4	49119.4
ACTC_RAT;ACTA_RAT	3	3	128.73	0.0029804	0.036181	2.33715	0.909223	BURIED	EXPOSED	42334	Actin, alpha cardiac muscle 1 OS=Rattus norvegicus OX=10116 GN=Actc1 PE=2 SV=1	132665	78253.2	71593.8	47788.8	61031.4	68549.1	110936	109137	85259.6	64102.2	78651	101951	104931	103437	230331	43784.7	52380	33766.3	119579	103573	127307	358869	297677	482579	190902	151296	262101	460527	1.14647e+06	554679	114382	102156	207986	136239	132877	125725	124742	55871.6
OSTP_RAT	18	17	1340.37	0.00411269	0.036181	2.12833	0.886912	BURIED	EXPOSED	35113	Osteopontin OS=Rattus norvegicus OX=10116 GN=Spp1 PE=1 SV=2	4.9726e+06	1.07337e+07	1.44475e+07	1.15447e+07	6.41563e+06	1.01297e+07	3.75714e+06	2.09632e+07	5.90205e+06	5.44104e+06	4.69206e+06	2.89756e+06	3.18819e+06	8.36102e+06	1.52003e+07	1.32945e+07	5.43596e+06	1.34241e+07	1.0649e+07	7.15973e+06	6.0921e+06	6.91075e+07	3.12432e+07	7.48177e+07	4.00495e+07	4.37571e+07	1.36598e+07	4.39673e+07	7.58515e+07	5.60117e+07	1.92114e+07	1.62336e+07	1.69193e+07	5.0285e+06	8.76127e+06	4.35109e+07	4.67565e+06	7.66373e+06
MMP13_RAT	9	9	334.78	0.00700645	0.0421441	2.05273	0.840717	BURIED	EXPOSED	53569	Collagenase 3 (Fragment) OS=Rattus norvegicus OX=10116 GN=Mmp13 PE=1 SV=1	440182	1.02922e+06	3.24944e+06	1.65258e+06	1.35089e+06	1.02046e+06	203179	584059	237490	335083	202504	137826	164805	527918	391706	780570	1.06062e+06	433845	337449	734223	424233	3.42996e+06	1.44716e+06	708294	1.44738e+06	2.93037e+06	768217	1.17487e+06	5.41567e+06	1.6956e+06	623007	980143	2.06994e+06	502648	717257	3.10916e+06	413896	734849
HMGB1_RAT	3	2	170.01	0.00794429	0.0442456	3.87003	0.827982	BURIED	EXPOSED	25049	High mobility group protein B1 OS=Rattus norvegicus OX=10116 GN=Hmgb1 PE=1 SV=2	5259.81	6467.66	21037.7	7916.48	10806.3	9809.48	7560.44	30100.7	22076.8	16528.7	2607.24	5664.34	9935.78	12943.5	33600.2	14953.3	39198.5	16934.6	10546.2	8424.89	7734.15	296777	74735.6	201989	142698	99800.8	139275	193098	732760	251909	25920.2	15678.5	50782.3	4990.8	5958.4	27575.3	4945.71	4617.82
COX5A_RAT	4	4	184.24	0.0101862	0.0528191	4.43892	0.800573	EXPOSED	BURIED	16347	Cytochrome c oxidase subunit 5A, mitochondrial OS=Rattus norvegicus OX=10116 GN=Cox5a PE=1 SV=1	49346.1	18651.7	19143.6	106803	207391	56064.6	23589.2	17183.7	15701.8	47386.1	211708	79168.2	189320	172626	185749	444846	1.0789e+06	375177	612098	264919	212544	66603	36188.8	117743	20333.2	52213.3	25562.6	21894.6	9702.77	22682	78706.9	46281.2	56060.8	51421.8	92032.2	42249.8	46399.3	13317
PDIA4_RAT	3	3	89.65	0.0114426	0.0537717	2.89356	0.786713	BURIED	EXPOSED	73017	Protein disulfide-isomerase A4 OS=Rattus norvegicus OX=10116 GN=Pdia4 PE=1 SV=2	14832.4	14742.1	25931.9	18343.5	13862.3	17152.3	3527.45	11155.5	7176.08	16037.9	10525.6	11484.6	7974.87	18582.8	26469.1	10548.6	11128.1	3709.59	5136.12	17324.1	31053.6	84791.4	15185.4	38341.2	88572.5	41028.4	41629.8	132651	182584	33451.5	4234.34	5865.44	23176.6	16938.1	25364.2	33877.3	13946.6	10525.7
VDAC1_RAT	5	5	212.08	0.0184594	0.0660918	6.41006	0.72262	EXPOSED	BURIED	30851	Voltage-dependent anion-selective channel protein 1 OS=Rattus norvegicus OX=10116 GN=Vdac1 PE=1 SV=4	87789.7	78278.3	52910.8	29923.2	140724	8770.78	36301.1	7564.38	9984.71	61982.5	488006	62482.4	119821	73385.5	53494.9	324161	912695	288966	58536.5	50664.5	65057.9	2153.72	2860.12	3027.4	6537.89	10575	12702	3542.31	10975.4	4059.47	61723.3	35039	35092	33718.8	13794.3	7771.96	82547	55889.5
DMP1_RAT	7	7	323.96	0.0190635	0.0666671	2.75213	0.717891	BURIED	EXPOSED	53141	Dentin matrix acidic phosphoprotein 1 OS=Rattus norvegicus OX=10116 GN=Dmp1 PE=2 SV=1	1.38119e+06	4.28942e+06	5.68551e+06	6.81762e+06	4.75844e+06	1.06941e+07	2.3937e+06	5.54301e+06	3.86571e+06	1.44077e+06	1.52835e+06	1.48931e+06	1.10083e+06	4.2049e+06	2.28375e+06	2.9663e+06	4.95953e+06	3.15747e+06	1.4271e+06	3.04908e+06	5.73435e+06	2.54478e+07	1.09292e+07	3.84824e+07	3.39803e+07	3.82767e+07	1.22276e+07	3.57922e+07	3.69513e+07	2.29572e+07	1.42742e+06	1.67325e+06	5.83564e+06	2.96302e+06	2.6107e+06	1.67091e+07	1.29871e+06	3.06258e+06
SET_RAT	2	2	59.89	0.0199787	0.067449	2.02629	0.710911	BURIED	EXPOSED	33386	Protein SET OS=Rattus norvegicus OX=10116 GN=Set PE=2 SV=2	2892.31	10931.7	40831.3	8823.57	13794.4	7419.5	7329	24627.9	20656.1	20071.4	15286.6	21101.4	43968.2	54683.1	65724.4	9080.76	9814.15	3288.62	9817.07	43470.9	98339.3	130668	49067.4	67241.2	200299	6377.65	102966	115544	81201.4	31679.9	36436.1	21966.9	72905.6	32890.9	37960.2	48939.6	2719.58	7805.07
CHAD_RAT	8	8	420.74	0.0212114	0.0678656	2.47418	0.70184	BURIED	EXPOSED	40892	Chondroadherin OS=Rattus norvegicus OX=10116 GN=Chad PE=2 SV=1	817828	720336	1.15098e+06	474892	391354	1.06924e+06	650060	713244	533664	769853	262915	871047	566591	584576	764227	272438	240225	232211	617828	606979	624854	1.34368e+06	1.05099e+06	2.68819e+06	1.36446e+06	994251	1.59776e+06	1.45578e+06	8.2973e+06	3.25185e+06	413962	566432	508886	318937	800219	2.72031e+06	768989	514309
LAC2_RAT	3	3	120.64	0.0279789	0.0764975	2.09928	0.657596	BURIED	EXPOSED	11482	Ig lambda-2 chain C region OS=Rattus norvegicus OX=10116 PE=4 SV=1	127670	75559.5	44667.9	76345.8	41103	55878.1	84043.4	65733.2	80759	38376.1	85780.9	72734.7	92474.1	87583.4	94949.8	27750.8	32343.8	19759.2	40564.1	69233.6	93161	264276	78327.9	123174	273470	86389.8	140133	96826.6	40346.8	12727.7	99991	97174.5	200694	390574	286718	240144	120045	53948.4
ILEUA_RAT	3	3	130.98	0.0329628	0.0854624	2.63595	0.629686	BURIED	EXPOSED	42871	Leukocyte elastase inhibitor A OS=Rattus norvegicus OX=10116 GN=Serpinb1a PE=1 SV=1	14006.2	4802.53	13590	3493.29	6182.38	10392.4	6846.85	6804.89	5494.63	4157.51	4398.74	4753.15	15883.5	17504.6	18650.7	3534.9	4025.97	2029.63	42379.6	40840.8	43592.3	104397	74418.2	63522.6	286156	102388	142544	10981.4	23259.9	19221.6	7873.9	11708.8	22155.5	15615.2	25395.1	12383	13169.8	3428.93
[truncated: 55 more columns]

## Sheet: PMI
Protein export PMI
	Accession	LBP	HEMO	GRZ2	NDKB	TRFE	LEG5	A1I3	LYOX	MFGM	DNSL3	HBA	SRPX	CALU	CO1A2	H4	CBPE	PCOC1	MDHM	HPT	PPA5	PCSK9	MMP2	MCPT8	ANXA3	CO1A1	DEF4	CALM1	HS90A	MGP	HEP2	HBB1	MBL1	HABP2	GDN	CCD80	PRELP	HBB2	PGS1	H2A1C	H33	ALDR	ILEUA	CBPZ	FA7	RCN3	PDIA3	CO2A1	A1AT
CTRL	NP-25	6297.28	1.49152e+06	432984	427173	2.69698e+06	71802.3	1.40411e+06	64498.7	56.7836	5324.4	4.53601e+07	94136.6	3781.14	4.88744e+07	126969	2.11302	216878	137192	165783	86185.7	15685.4	7447.71	294332	14188.4	1.12616e+08	1.17215e+07	19719.2	8390.35	3.77967e+06	16185.8	2.93219e+06	2251.04	307475	15746.3	57641.1	929.573	650950	3.20344e+06	146047	45541.7	116277	225277	60008.2	140544	16275.7	18933.2	1.74931e+06	200910
	NP-26	1101.93	890301	319444	579151	1.88914e+06	72635.7	1.76265e+06	38552	68.1995	5923.5	4.76311e+07	93292.8	12460.7	3.29203e+07	103408	729.218	385814	113160	248363	24780.6	6976.47	45623.5	148898	7753.63	7.7432e+07	1.62958e+07	14822	6161.79	3.95517e+06	20323.7	2.78984e+06	4078.08	241870	13129.1	72687.6	2313.46	517698	2.75407e+06	286637	40827.6	56309.6	422832	87775.1	158076	24801.3	16552.6	1.19931e+06	335155
	NP-27	10647.5	1.08161e+06	160779	198341	2.73077e+06	66281.8	1.71899e+06	75054.3	1353.43	7821.34	2.73688e+07	95189.8	13908.3	7.46523e+07	99243.4	2824.57	596274	87176.8	230965	88385.4	10697	89104.7	106683	4718.16	1.71167e+08	1.00217e+07	12793.7	2904.95	6.26458e+06	29554.2	4.25328e+06	696.493	403765	12264.5	152363	717.656	880272	3.95073e+06	280072	23493.4	84924.4	243637	44401.2	248696	40156.9	24210.1	556474	416105
12 WEEKS	NP-28	34472.9	67045	58895.2	13243	133437	112948	31412.5	163249	8929.37	6327.99	2.94683e+06	91654.9	13613.3	9.60158e+07	562170	3126.32	220212	7191.28	78707.1	183207	20014.6	76062.5	88380.1	2464.6	2.01759e+08	1.09922e+07	31306.2	24061	3.15231e+06	48782.3	538558	9904.11	368875	8992.55	119368	7003.92	139936	2.58418e+06	942226	183410	4114.34	7873.9	33067.9	233953	45553.3	41088.9	1.38099e+06	530392
	NP-29	62295.3	37726.6	47999.8	7845.96	129287	46510.7	16451.2	200949	10873	10649.7	1.85876e+06	204783	19372.2	8.07315e+07	972785	4962.45	276121	2594.63	56816.7	319864	23317.6	74789.1	67062.4	6873.09	1.78411e+08	7.62343e+06	49029.5	27842.1	3.15864e+06	47779.1	346060	9117.32	450848	17572.9	93968.3	3930.89	103686	2.68831e+06	1.11687e+06	285072	3286.19	11708.8	50134.5	207158	54231.1	38670	1.9102e+06	638301
	NP-30R	106278	114274	126541	12484.2	288324	38559.7	22169.1	514057	21581.5	37170.1	8.08226e+06	458065	39341.8	1.69928e+08	1.14466e+06	3599.21	366999	3391.88	64647.5	286461	38366.2	57793.2	242947	5764.82	3.3699e+08	4.22525e+06	69826.7	136853	5.30424e+06	136311	1.34302e+06	20444.9	945404	52443.5	89060.9	2471.71	295170	4.83077e+06	2.43124e+06	372818	2329.93	22155.5	128851	407788	81860.8	70671.7	4.00947e+06	472654
	NP-31	15884.6	104430	178510	22909.6	799921	82925.1	70722.2	39503.2	1681.42	4480.84	1.70585e+08	59049	18202.6	8.38236e+07	676934	123.969	99061.1	32463.8	75602.2	54287	125254	29667	124116	73503.1	1.86552e+08	3.72033e+06	132524	10470	3.51055e+06	50389.3	1.81885e+07	5554.3	374102	2618.52	35884.3	6935.78	3.00162e+06	1.9382e+06	2.38292e+06	434431	14288.4	42379.6	26064.5	493046	8188.67	106681	1.52679e+06	260571
	NP-32	50212	78850.6	126603	15651.8	565186	60326.5	46698.3	222855	7290.74	25459.4	3.31855e+07	204507	25133.7	1.31792e+08	1.29011e+06	4671.54	244531	8099.99	60657.9	149948	47654.8	197856	124366	110298	2.84797e+08	1.30221e+06	243362	12469.8	4.73263e+06	116963	8.84934e+06	5415.33	808559	3397.2	61001.2	4906.8	1.44569e+06	4.33513e+06	2.11878e+06	434905	7300.34	40840.8	40340.5	1.16055e+06	35626.2	144047	1.70218e+06	551618
	NP-33	44140.4	112464	207381	12431.1	541632	90723	65744.2	251528	5745.45	36729.2	5.5177e+07	252539	20867	9.69273e+07	1.49221e+06	5779.16	342622	7963.28	61618	70640.5	57714.6	115033	252691	100780	2.00925e+08	1.05747e+06	323482	9677.92	5.0416e+06	214094	1.3752e+07	10226.9	1.24835e+06	6589.29	51428	2105.85	2.5221e+06	4.87546e+06	3.72432e+06	699238	10390.1	43592.3	56470.3	1.90685e+06	38056	222661	969804	489400
	NP-19	51052.6	43975	57263.9	22255.3	210167	34031	25171	304560	3133.63	20017.8	3.50887e+06	235292	31020.9	8.85067e+07	870275	32094.8	825169	7842.99	103132	124695	17955.4	253467	62081.8	14290.5	2.30079e+08	2.19886e+06	111465	18120.7	3.32798e+06	216685	1.68506e+06	6419.86	466256	9549.65	147155	2024.89	386133	3.85234e+06	807738	191093	11175.7	15883.5	79951.9	150713	64447	90669.5	1.07151e+06	1.79028e+06
	NP-20	41960.3	31827.3	49794.7	19810.9	220714	43624.1	10247.5	449240	11959.1	22689.7	3.67332e+06	448889	27234.2	1.15677e+08	1.633e+06	23121.7	605018	9627.38	65433.6	307129	21412.4	220167	87725.9	13447.8	3.61416e+08	1.44406e+06	49497.4	25027.8	4.98023e+06	92311	2.02716e+06	11748.8	530982	21564.2	129321	7492.33	438726	5.5841e+06	1.27749e+06	332762	7915.74	17504.6	117601	298228	68419.1	89597.5	2.55485e+06	1.02885e+06
	NP-21	72190.7	59883.9	57617.4	38301.2	297053	21486.1	55497.3	153848	6528.4	8247.14	1.06899e+07	211372	63823	5.74114e+07	869866	29851.5	958045	3629.79	93868.5	125656	6551.16	160542	87275	9243.34	1.51915e+08	2.98987e+06	163489	36315	4.9699e+06	102793	3.73439e+06	6204.66	336199	17520.6	249937	2009.56	818920	3.43119e+06	965246	219186	10877.6	18650.7	62566.7	84817.5	96396.6	70785.6	2.65582e+06	1.25119e+06
20 WEEKS	NP-1	189505	24266.8	19265.6	14200.4	176238	2723.12	11781.9	340667	6028.33	25952.3	1.04867e+06	398648	57461	1.38659e+08	1.77286e+06	46885.9	1.16845e+06	3389.5	250867	232828	14890	324655	62663.5	9120.63	404307068	5.58235e+06	288012	32289.3	5.10639e+06	260569	682924	27270.1	507174	26834.1	275208	3215.71	130210	3.41927e+06	859591	317616	472.667	14006.2	95354.5	207060	94435.7	35856.2	1.97847e+06	1.90642e+06
	NP-2	273884	29594.8	9598.12	3520.07	201458	1190.32	4385.97	774136	14341	68188.4	404593	691271	63326.6	1.83016e+08	813287	32483	900261	820.908	127328	407029	38420.6	351342	27963.1	10757.8	4.8324e+08	2.76133e+06	237097	25798.3	1.04643e+07	410934	347218	55903.8	1.25681e+06	37328.9	259553	5615.1	64757.4	6.43854e+06	244497	128387	163.75	4802.53	176934	580730	92777.7	33046.8	4.33272e+06	1.09992e+06
	NP-3	332478	33538.8	6766.61	5332.65	176413	1772.96	3647.54	622484	118440	91013.7	307962	781740	62166.5	2.6423e+08	375031	22902.6	745423	19389.8	80910	1.27196e+06	26816.6	136507	26405.5	4132.48	8.25863e+08	1.79019e+06	189790	66442.5	6.75941e+06	122492	174646	176595	735722	85562.4	328658	44189.9	76801.2	9.96567e+06	147178	48276.5	0	13590	138712	580880	63576.4	20348.9	2.40305e+07	915505
	NP-4	206712	185385	57748.6	30686.9	532799	28808.7	108803	420441	8248.87	64408.2	2.98308e+06	585020	109870	1.02947e+08	1.02468e+06	75680.4	2.36695e+06	11744.9	564909	740941	30347	743773	134501	455.957	2.50571e+08	464029	261059	81001.8	9.18526e+06	299469	988507	11959	746953	63851	685530	4524.04	285118	8.1471e+06	1.33491e+06	296711	17482.2	286156	230724	285253	109194	111480	3.16019e+06	1.93937e+06
	NP-5	389722	81553.9	12692.5	22212.5	469614	9350.8	49806.7	744173	56595.7	124910	2.39039e+06	789666	62460.4	2.04809e+08	912764	28881.7	1.20252e+06	8746.83	173582	1.5795e+06	56894.2	475984	73069.1	830.014	4.88757e+08	305134	197874	56028.2	9.99642e+06	191794	596343	7351.52	1.1609e+06	98583.1	589707	22625.1	183260	1.29172e+07	899021	180614	1573.02	102388	266413	780160	106180	74883.3	1.33719e+07	852175
	NP-6	110846	108862	50435.1	40315.4	557804	15653.6	35432.8	597368	20049.1	116435	3.22573e+06	703092	50735.1	1.42996e+08	2.34155e+06	38008.7	1.43726e+06	8360	207233	466584	54789.7	782303	113750	1040.1	3.44148e+08	520718	237778	67385.2	7.93507e+06	485270	1.24834e+06	7588.25	1.14329e+06	36379.7	430470	8995.25	317804	1.29922e+07	1.99664e+06	599337	4839.43	142544	226749	514366	102685	123746	4.51535e+06	1.55514e+06
	NP-7	212796	15678.9	2964.95	3101.92	275748	5028.41	9349.71	683501	77923.3	64982.2	624124	699224	97944	2.6553e+08	1.24903e+06	18925.2	1.21042e+06	10984.4	259014	1.06682e+06	60327	181601	7875.9	297.963	7.75981e+08	743062	499757	42370.8	9.28862e+06	741713	659485	4352.88	1.26536e+06	59059.1	247012	41868.4	264713	1.15597e+07	302588	132864	2755.96	3493.29	131806	1.00619e+06	93207.6	36465.1	2.04985e+07	1.99001e+06
	NP-8	98433.1	30331	15978.5	5623.77	239009	12363.8	6840.38	722758	25559.9	95820.9	740044	716775	53465.2	1.44718e+08	795143	25527.9	722203	10936.6	91786.7	855971	50656.6	229388	46747.7	4577.61	4.73257e+08	751490	190650	22851.2	9.45887e+06	499310	640277	23916.5	1.21438e+06	57333.6	145183	15171.1	126441	6.66065e+06	329485	125538	1548.69	6182.38	153876	769152	95492.5	43019.7	7.00128e+06	1.11687e+06
	NP-9	321143	21974.9	3082.98	6356.14	279251	2584.23	17647.6	634871	21457.5	117951	549353	805080	108101	2.00328e+08	1.34367e+06	52342.7	1.34096e+06	11205.7	89552.5	936554	47282.5	526104	15300.5	2473.13	507968013	377398	250332	24156.4	1.8464e+07	469716	472627	17535.3	1.36518e+06	63381.5	325561	16508.5	95007.3	9.46397e+06	364243	133991	559.232	10392.4	204565	757762	81968.8	57633.9	8.12599e+06	1.36668e+06
24 WEEKS	NP-34	111709	43384.2	30013.7	9320.5	313201	25641.3	12394	1.10018e+06	1627.38	51512.5	1.02601e+06	350395	31626.9	2.66781e+08	1.9182e+06	10231.7	616850	3125.83	143876	146809	47281.1	140329	58999.7	3374.15	7.68353e+08	2.34586e+06	252369	76717.2	6.79365e+06	303773	670755	38785.1	1.82061e+06	30084.1	114191	712.574	200673	5.47576e+06	1.08754e+06	438620	2402.19	15615.2	136405	369068	92236.3	42630.7	1.80204e+06	1.59246e+06
	NP-35	133865	70643.7	38205.4	10461.2	458784	14222	9839.65	1.05083e+06	4920.44	52411.4	1.31732e+06	409453	79280.5	3.13606e+08	2.0022e+06	22189	974090	5336.58	101005	151494	57968.5	180353	60667.3	1113.16	8.98956e+08	7.24993e+06	175161	70420.5	1.41114e+07	484434	492659	59087.2	1.93002e+06	52051.7	96925.4	458.718	166432	8.635e+06	1.32231e+06	446420	288.331	25395.1	269477	548846	62144.8	50978.2	2.20853e+06	1.07038e+06
	NP-36	78710.1	49856.9	17236.4	7887.79	222361	3114.97	11058	1.17347e+06	6496.33	47121.5	1.66862e+06	486785	99049	3.37711e+08	2.39177e+06	16330.8	1.24861e+06	2148.34	64514.7	744273	53859.1	245577	37008.3	968.536	8.28237e+08	1.64162e+06	292320	65595.6	1.00809e+07	110461	871586	75669.1	1.00921e+06	52477.5	282633	2714.59	234535	9.71459e+06	1.5449e+06	369649	607.555	12383	196503	434626	123431	52813.8	2.85447e+06	836210
	NP-37	64868	92141.7	163746	9187.69	379024	17343.5	105070	630740	18847.8	78446.8	4.42425e+06	765367	36721.9	1.4089e+08	515933	15948.4	1.06614e+06	7291.34	55953.2	465356	117871	187083	227134	2054.53	2.55762e+08	853153	110180	50464	7.63327e+06	425861	1.13908e+06	26648.6	2.30722e+06	55537.7	221626	1978.97	184297	1.5191e+07	594063	139665	513.973	104397	265238	1.21427e+06	134985	77831.4	3.60306e+06	643153
	NP-38	53662.8	39351	86105.6	11442.9	212653	16412.3	39872	296067	19115	60737.7	3.02968e+06	499397	20145	7.0921e+07	713063	7544.78	484222	4298.07	48332.6	224731	47072.1	126669	68312.1	1366.51	1.472e+08	2.16997e+06	33087.2	26312.9	4.10135e+06	113009	526160	25209	1.03177e+06	47282.7	144903	5116.41	88790.4	7.83303e+06	1.23994e+06	281698	2937.44	74418.2	140601	389877	49191.5	50072.4	3.2668e+06	398067
	NP-39	35586.3	36205.8	162777	22386.7	349075	17822.5	151869	405773	7800.43	50799.5	5.30226e+06	606117	20826.6	1.02625e+08	1.4112e+06	12711.5	989161	11661.6	46967.2	81917.4	84417.3	227367	98674.8	1609.6	1.68849e+08	504827	102764	30640.9	7.37785e+06	143797	1.28155e+06	39807	1.73494e+06	37741.9	264249	4373.11	220845	1.32181e+07	2.08799e+06	368112	4453.4	63522.6	248416	653854	71778.5	52517.6	849784	316298
	NP-22	115768	10345.4	23735.5	3568.64	111337	38342.8	4117.77	521968	17233.3	18513.6	951863	305018	56522.1	3.09847e+08	555295	8164.55	572475	3588.93	40637	355793	39393.7	122167	43064	2076.97	8.28962e+08	692971	311492	30928.3	6.13156e+06	119090	195445	15039.1	557395	12157.9	146232	4878.25	101361	6.76554e+06	349502	62072.6	3634.27	3534.9	62812.3	908160	60628.5	17748.5	3.65405e+06	676515
	NP-23	64455.2	36726.1	25301.2	1814.38	113665	11067.3	5087.72	361726	36333.9	32369.8	1.29472e+06	437014	48488.5	2.38544e+08	438489	15505.2	471708	4962.73	42147	443378	32826.8	106594	72138.1	3649.5	5.92965e+08	408844	74564	17553.4	5.18358e+06	116193	589408	10492.9	587752	27743.1	124027	15460.9	212790	5.21656e+06	541946	87379.8	711.494	4025.97	67172.7	470519	37518.5	18365.9	1.30718e+07	732148
	NP-24	14043.1	26354.7	17605.6	961.974	122497	31771.3	4703.27	642684	19993.1	7704.89	1.1622e+06	126332	79115.4	3.81297e+08	312178	1861.33	354901	12172.6	26612.1	229530	21780	47718.7	29396.2	537.044	9.90868e+08	480762	235239	13727	3.36864e+06	11566.1	147116	14192.3	164750	9283.99	93512.8	11984.5	151985	3.96528e+06	267754	33583.2	2485.02	2029.63	25081.9	455409	39465	3476.91	9.98077e+06	481379
28 WEEKS	NP-10	81224.5	51858.3	16136.4	18729.9	270235	4519.49	21280.4	398549	2536.51	50226.2	4.90118e+06	672695	65967.9	190284705	945178	37533.3	2.0423e+06	7521.15	85597.4	578703	14092.5	434495	4833.48	2606.91	4.68463e+08	375591	91767.7	100709	1.16721e+07	113652	1.6045e+06	10581.1	558468	45134.4	463308	355.594	452975	1.38237e+07	992186	227903	1886.49	10981.4	118659	480516	125616	42268.4	2.60014e+06	903947
	NP-11	54641.8	49278.3	9091.06	16439.9	101769	4877.91	41232.6	151716	89038.9	74033.5	8.74156e+06	879942	47595.4	1.58164e+08	524415	17459.4	919725	19706.6	28697.9	875339	22837	164349	19190.5	5619.75	3.65036e+08	404620	36862.8	112104	8.69459e+06	14900.7	1.44804e+06	34875	381465	56479.8	541361	9672.29	469889	2.31437e+07	771669	160289	167.622	23259.9	213972	262005	113938	36051.4	3.01126e+07	322990
	NP-12	5452.39	58214.9	16420.6	8898.11	53405.5	3862.77	31486.5	107476	13487.9	13973.6	3.36205e+06	294826	13174.6	9.16292e+07	305364	6370.53	752179	25685.8	115443	283864	14965.1	86921.3	107223	2501.54	1.99603e+08	378905	24272.9	176842	1.15852e+07	14466.8	524931	12411.4	165254	21927.4	116480	1153.58	273758	6.80322e+06	428518	76879.4	0	19221.6	101627	138743	46634.8	8927.03	2.07184e+07	240009
	NP-13	30983.1	18694.1	21664.8	3095.16	141614	11225.6	4417.05	309993	2640.1	17866.7	644344	285931	43716.9	168576132	958151	27110.1	808617	3216.49	47915	169917	11173.2	248618	16852.6	3456.69	4.3738e+08	2.85263e+06	98470.1	25971.3	5.72839e+06	190591	316055	25136.5	327702	17331.5	217717	1407.62	120997	3.46675e+06	1.00726e+06	226143	338.671	6846.85	109366	88774.7	54828.8	39556.6	2.06622e+06	1.26855e+06
	NP-14	49422.7	26605.7	15287.7	4444.63	96713.7	1806.61	11105.6	281789	3742.3	9513.44	1.28597e+06	174554	43478.7	2.03281e+08	878999	13971.4	927775	9436.64	40440.9	287349	15881.9	121273	21097.2	1268.53	4.37149e+08	926838	87828.3	49657	4.43899e+06	52817.2	430729	122607	227991	19751.4	206224	49.3868	128261	4.19587e+06	1.57229e+06	208433	2050.07	6804.89	70601.9	106724	48869.1	42293.4	2.30899e+06	871408
	NP-15	35646.8	26791	17388.1	3435.38	138944	5318.52	13825.1	355119	1799.8	13607.8	836128	171770	51144.5	2.23268e+08	927369	29142.6	1.31728e+06	16087.5	52914.6	78307.9	9665.25	127894	19382.2	5250.24	4.89609e+08	511880	112347	33087.1	6.28347e+06	120833	201757	69742.6	292090	25943.1	209429	535.961	86975.3	3.54771e+06	1.42582e+06	254921	1440.48	5494.63	96294.7	88341.3	53492.2	24128	5.65291e+06	1.39938e+06
	NP-16	36522	55033.4	11516.8	1633.72	188716	16397.1	4532.83	556693	2326.11	17939.1	399933	312613	53985.1	2.27321e+08	1.37331e+06	28552.7	1.18685e+06	13686.2	58017.1	160677	19479.6	235300	16262.4	1267.18	758882617	855823	336575	34769.2	8.99856e+06	128643	281152	10433.2	519086	7342.57	78971	1288.87	176626	5.99724e+06	643825	359754	645.371	4157.51	94964	381159	82951	14260.7	1.19402e+07	963674
	NP-17	46095.3	8787.27	11511.8	4250.95	202517	662.009	5595.25	539019	2823.46	11140.1	337897	245568	114626	2.18961e+08	1.00395e+06	31269.9	1.23529e+06	2802.52	149281	72830.8	10369.9	193634	33310.5	2911.35	6.68809e+08	1.24973e+06	535629	27577.5	8.62271e+06	207307	171454	7042.7	438976	5829.22	69377.3	2359.87	160179	5.37804e+06	463146	172180	1741.29	4398.74	75383.8	232917	102447	14848.6	2.30743e+06	1.55724e+06
	NP-18	39880.7	20179.1	8159.29	9541.87	306548	333.562	2406.03	582688	1097.38	20906.1	559619	466322	61088.2	2.53127e+08	2.51189e+06	39442.5	1.87016e+06	7989.77	68742.7	142359	14179.3	434547	5113.13	2663.03	8.89521e+08	1.52624e+06	331807	38523	1.1353e+07	120446	369175	32255	407529	17142.1	118566	3676.67	204816	7.11084e+06	1.51404e+06	658118	266.14	4753.15	128350	126686	114781	28650.9	2.30325e+06	1.43874e+06
[truncated: 42 more columns]
